# Supplementary material for: Pd-Catalyzed stereospecific allyl–aryl coupling of allylic alcohols with arylboronic acids
Source: Royal Society of Chemistry journal article supplement (doi:10.1039/c3cc45053h), 2013-01-01
Supplement: c3cc45053h.pdf [file c3cc45053h.pdf]

## Supporting Information

# Pd-catalyzed stereospecific allyl-aryl coupling of allylic alcohols with arylboronic acids

*Jiang Ye, Jingming Zhao, Jing Xu, Yuxue Mao, Yong Jian Zhang\**

School of Chemistry and Chemical Engineering, and Shanghai Key Laboratory of Electrical Insulation and Thermal Aging, Shanghai Jiao Tong University

Fax: (+) 86-21-54741297; E-mail: yjian@sjtu.edu.cn

### Table of Contents

General Experimental Details

General Procedure for Synthesis of Chiral Allylic Alcohols

Spectroscopic Data for Allyl Alcohols

General Procedure for Pd-Catalyzed Allyl-Aryl Coupling of Allyl Alcohols with Arylboronic Acids

Spectroscopic Data for Substrates and Allyl-Aryl Coupling Products

References

HPLC Charts for Enantiomeric Enriched Substrates and Products

## General Experimental Details

Analytical thin-layer chromatography (TLC) was carried out using 0.2-mm commercial silica gel plates (Yantai Jiangyou Silica Gel Development Co., Ltd., silica gel HSGF 254). Preparative column chromatography employing silica gel (Qingdao Shenghai Fine Silica Gel Chemical Co., Ltd., 200-300 mesh) was performed according to the method of Still.<sup>1</sup> Toluene, cyclohexane, dichloromethane, ether and pentane were distilled from CaH<sub>2</sub>, THF was distilled from sodium/benzophenone. Methanol was treated with a small amount of sodium before distillation. Proton nuclear magnetic resonance (<sup>1</sup>H NMR) spectra and Carbon-13 nuclear magnetic resonance (<sup>13</sup>C NMR) spectra were recorded with a Varian Mercuryplus 400 NMR spectrometer. Chemical shifts are reported in delta (δ) units, parts per million (ppm) downfield from tetramethylsilane or ppm relative to the center of the singlet at 7.26 ppm for deuteriochloroform. Coupling constants are reported in Hertz (Hz). Chemical shifts are reported in delta (δ) units, ppm relative to the center of the triplet at 77.0 ppm for deuteriochloroform. And the following abbreviations are used to indicate the multiplicity: s, singlet; d, doublet; t, triplet; q, quartet; m, multiplet; br, broad. High performance liquid chromatography (HPLC) was performed on Thermo Fisher Scientific Dionex Ultimate 3000 HPLC by using Daicel Chiracel OD-H or OJ-H columns with *i*-PrOH/hexane as the eluent. Optical rotations were measured on a SGW-1 polarimeter. The melting points were measured by Netzsch DSC-200 F3 differential scanning calorimeter.

Pd<sub>2</sub>(dba)<sub>3</sub>•CHCl<sub>3</sub> and all ligands were purchased from Sinocompound Co. and used as received. The arylboronic acids were purchased from Accela ChemBio Inc. and used after recrystallization with water. Racemic allylic alcohols were prepared by available methods: *rac*-**1a**,<sup>2</sup> *rac*-**1b**,<sup>3</sup> *rac*-**1c**,<sup>4</sup> *rac*-**1f**<sup>5</sup>; for *rac*-**1d** and *rac*-**1e**: the first step is to synthesis the corresponding unsaturated ketones,<sup>6</sup> then reduce the ketones by using NaBH<sub>4</sub> and CeCl<sub>3</sub>·7H<sub>2</sub>O (MeOH as solvent, ice bath) under the monitoring of TLC. All other chemicals were used as received from commercial resources.

### General Procedure for Synthesis of Chiral Allylic Alcohols<sup>7</sup>

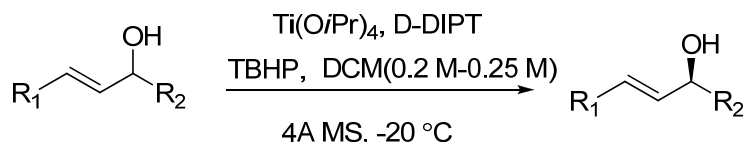

To a cooled (-20 °C) suspension of 4Å Molecular Sieves in dry DCM (0.2 M–0.25M), Ti(OiPr)<sub>4</sub> (0.3 eq) and D-DIPT (0.3 eq) were added under N<sub>2</sub> atmosphere. After stirred for half an hour, allylic alcohol (1.0 eq) in DCM and TBHP (0.6–0.8 eq, approx 5.5 M solution in decane) was added subsequently. After keeping stirred for another 12 hours at the same temperature, the reaction was quenched by adding an aqueous solution of FeSO<sub>4</sub>·7H<sub>2</sub>O (2.0 eq) and tartaric acid (1.3 eq). Then the mixture was continued to be stirred for 30 min at -20 °C and more than 3 hours in addition at room temperature. The mixture was extracted with DCM three times, dried over Na<sub>2</sub>SO<sub>4</sub> and concentrated under reduced pressure. The crude compound was purified by flash column chromatography (EA:PE = 1:100–1:20, v/v) to afford enantioenriched allylic alcohols in 25–37% yields.

#### (*S,E*)-4-phenylbut-3-en-2-ol (**1a**)<sup>8</sup>

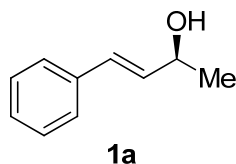

White solid; m.p. 54 °C; <sup>1</sup>H NMR (400 MHz, CDCl<sub>3</sub>): δ 7.40–7.22 (m, 5H), 6.57 (d, *J* = 15.6 Hz, 1H), 6.26 (dd, *J* = 15.8, 6.4 Hz, 1H), 4.53–4.46 (m, 1H), 1.75 (br s, 1H), 1.38 (d, *J* = 6.4 Hz, 3H); <sup>13</sup>C NMR (100 MHz, CDCl<sub>3</sub>): δ 136.6, 133.5, 129.3, 128.5, 127.6, 126.4, 68.9, 23.4; [α]<sup>25</sup><sub>D</sub> = -26.0 (*c* = 0.32, CHCl<sub>3</sub>); 96% ee; [lit.<sup>8</sup> [α]<sup>20</sup><sub>D</sub> = -27.0 (*c* = 1.0, CHCl<sub>3</sub>), 98% ee]; HPLC conditions: Chiralcel OD-H column, 254 nm, flow rate: 1.0 ml/min, *i*-PrOH/hexane = 10/90, *t*<sub>major</sub> = 13.2 min, *t*<sub>minor</sub> = 8.7 min.

#### (*S,E*)-1-phenylhept-1-en-3-ol (**1b**)<sup>9</sup>

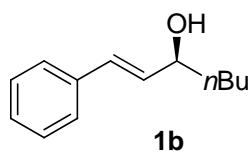

Colourless oil; <sup>1</sup>H NMR (400 MHz, CDCl<sub>3</sub>): δ 7.40–7.22 (m, 5H), 6.57 (d, *J* = 16.4 Hz, 1H), 6.23 (dd, *J* = 15.6, 6.4 Hz, 1H), 4.28 (m, 1H), 1.71–1.56 (m, 3H), 1.46–1.32 (m, 4H), 0.91 (t, *J* = 6.8 Hz, 3H); <sup>13</sup>C NMR (100 MHz, CDCl<sub>3</sub>): δ 136.7, 132.6, 130.2, 128.6, 127.6, 126.4, 73.1, 37.1, 27.6, 22.6, 14.1; [α]<sup>22</sup><sub>D</sub> = +1.3 (*c* = 0.72, CHCl<sub>3</sub>); 96% ee; [lit.<sup>9</sup> [α]<sup>20</sup><sub>D</sub> = +1.5 (*c* = 0.68, CHCl<sub>3</sub>), 98% ee]; HPLC conditions: Chiralcel OD-H column, 254 nm, flow rate: 1.0 ml/min, *i*-PrOH/hexane = 10/90, *t*<sub>major</sub> = 12.2 min, *t*<sub>minor</sub> = 7.9 min.

#### (*S,E*)-1,5-diphenylpent-1-en-3-ol (**1c**)<sup>10</sup>

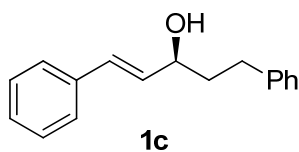

Colorless oil;  $^1\text{H}$  NMR (400 MHz,  $\text{CDCl}_3$ ):  $\delta$  7.40–7.18 (m, 10H), 6.59 (d,  $J = 15.6$  Hz, 1H), 6.25 (dd,  $J = 16.0$ , 7.2 Hz, 1H), 4.34–4.28 (m, 1H), 2.83–2.70 (m, 2H), 2.04–1.89 (m, 2H), 1.61 (s, 1H);  $^{13}\text{C}$  NMR (100 MHz,  $\text{CDCl}_3$ ):  $\delta$  141.7, 136.6, 132.1, 130.6, 128.6, 128.45, 128.38, 127.7, 126.4, 125.9, 72.3, 38.7, 31.7;  $[\alpha]_{\text{D}}^{22} = +13.2$  ( $c = 0.68$ ,  $\text{CHCl}_3$ ); 98% ee; [lit.<sup>10</sup>  $[\alpha]_{\text{D}}^{20} = +20$  ( $c = 0.6$ , EtOH), 79% ee]; HPLC conditions: Chiralcel OD-H column, 254 nm, flow rate: 1.0 ml/min, *i*-PrOH/hexane = 15/85,  $t_{\text{major}} = 16.0$  min,  $t_{\text{minor}} = 14.1$  min.

**(*S,E*)-4-(*p*-tolyl)but-3-en-2-ol (1d)**<sup>8,11</sup>

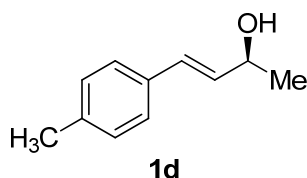

Colorless oil;  $^1\text{H}$  NMR (400 MHz,  $\text{CDCl}_3$ ):  $\delta$  7.28 (d,  $J = 7.6$  Hz, 2H), 7.13 (d,  $J = 8.0$  Hz, 2H), 6.53 (d,  $J = 15.2$ , 1H), 6.21 (dd,  $J = 16.0$ , 6.8 Hz, 1H), 4.51–4.45 (m, 1H), 1.59 (bs, 1H), 2.34 (s, 3H), 1.37 (d,  $J = 6.8$  Hz, 3H);  $^{13}\text{C}$  NMR (100 MHz,  $\text{CDCl}_3$ ):  $\delta$  137.4, 133.8, 132.5, 129.3, 129.2, 126.3, 69.0, 23.4, 21.2;  $[\alpha]_{\text{D}}^{25} = -20.9$  ( $c = 0.67$ ,  $\text{CHCl}_3$ ); 98% ee; [lit.<sup>8</sup>  $[\alpha]_{\text{D}}^{20} = -22.8$  ( $c = 1.0$ ,  $\text{CHCl}_3$ ), >99% ee]; HPLC conditions: Chiralcel OD-H column, 254 nm, flow rate: 1.0 ml/min, *i*-PrOH/hexane = 10/90,  $t_{\text{major}} = 9.9$  min,  $t_{\text{minor}} = 8.5$  min.

**(*S,E*)-4-cyclohexylbut-3-en-2-ol (1e)**<sup>12</sup>

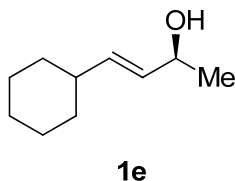

Colorless oil;  $^1\text{H}$  NMR (400 MHz,  $\text{CDCl}_3$ ):  $\delta$  5.58 (dd,  $J = 15.2$ , 6.4 Hz, 1H), 5.46 (ddd,  $J = 15.2$ , 6.4, 0.8 Hz, 1H), 4.25 (m, 1H), 1.97–1.89 (m, 1H), 1.75–1.62 (m, 4H), 1.46 (d,  $J = 2.8$  Hz, 1H, OH), 1.32–1.00 (m, 6H), 1.25 (d,  $J = 6.0$  Hz, 3H);  $^{13}\text{C}$  NMR (100 MHz,  $\text{CDCl}_3$ ):  $\delta$  136.5, 131.5, 68.8, 40.0, 32.71, 32.69, 26.0, 25.9, 23.3;  $[\alpha]_{\text{D}}^{22} = -16.4$  ( $c = 0.56$ ,  $\text{CHCl}_3$ ); 95% ee; [The ee value was determined after converted to *p*-nitrobenzoate. HPLC conditions: Chiralcel OJ-H column, 254 nm, flow rate: 0.8 ml/min, *i*-PrOH/hexane = 3/97,  $t_{\text{major}} = 7.32$  min,  $t_{\text{minor}} = 8.76$  min].

**(*S,E*)-1-phenylhex-4-en-3-ol (1f)**<sup>13</sup>

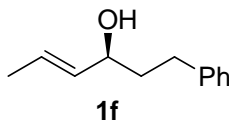

Colorless oil;  $^1\text{H}$  NMR (400 MHz,  $\text{CDCl}_3$ ):  $\delta$  7.28 (t,  $J = 7.6$  Hz, 2H), 7.21–7.16 (m, 3H), 5.68 (dq,  $J = 21.6$ , 6.8 Hz, 1H), 5.52 (ddd,  $J = 15.2$ , 6.8, 1.6 Hz, 1H), 4.09–4.04 (m, 1H), 2.75–2.62 (m, 2H), 1.71 (d,  $J = 6.4$  Hz, 3H), 1.46 (bs, 1H);  $^{13}\text{C}$  NMR (100 MHz,  $\text{CDCl}_3$ ):  $\delta$  142.0, 134.0, 128.4, 128.3, 127.1, 125.7, 72.3, 38.7, 31.7, 17.7;  $[\alpha]_{\text{D}}^{22} = -21.1$  ( $c = 0.56$ ,  $\text{CHCl}_3$ ); 98% ee; HPLC conditions: Chiralcel OD-H column, 220 nm, flow rate: 1.0 ml/min, *i*-PrOH/hexane = 10/90,  $t_{\text{major}} = 6.8$  min,  $t_{\text{minor}} = 8.9$  min.

### General Procedure for Pd-Catalyzed Allyl-Aryl Coupling of Allyl Alcohols with Arylboronic Acids

To a 10 mL Schlenck flask equipped with a stir bar, was added Pd<sub>2</sub>(dba)<sub>3</sub>·CHCl<sub>3</sub> (0.004 mmol), *rac*-BINAP (0.008 mmol), Allyl alcohol **1** (0.4 mmol), and Arylboronic acid **2** (0.6 mmol), after the system was degassed and recharged with N<sub>2</sub> three times, Toluene (0.8 mL) was injected *via* syringe. The mixture was stirred at 50 °C for 18 or 24 h, and then the solvent was evaporated under reduced pressure. The residue was purified by flash column chromatography (ethyl acetate: petroleum ether, 1:200–1000) to furnish corresponding allyl–aryl coupling products.

#### (*R, E*)-But-1-ene-1,3-diylidibenzene (**3a**)<sup>12</sup>

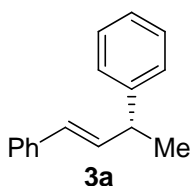

Colorless oil; <sup>1</sup>H NMR (400 MHz, CDCl<sub>3</sub>): δ 7.36–7.17 (m, 10H), 6.44–6.35 (m, 2H), 3.64 (dq, *J* = 6.8, 6.8 Hz, 1H), 1.46 (d, *J* = 6.8 Hz, 3H); <sup>13</sup>C NMR (100 MHz, CDCl<sub>3</sub>): δ 145.6, 137.5, 135.2, 128.5, 127.3, 127.0, 126.2, 126.1, 42.5, 21.2; [α]<sub>D</sub><sup>25</sup> = +34.7 (*c* = 0.41, CHCl<sub>3</sub>); 96% ee; [lit.<sup>12</sup> [α]<sub>D</sub><sup>20</sup> = +37.4 (*c* = 0.59, CHCl<sub>3</sub>), 97% ee]; HPLC conditions: Chiralcel OD-H column, 254 nm, flow rate: 1.0 ml/min, *i*-PrOH/hexanes = 0.1/99.9, *t*<sub>minor</sub> = 10.8 min, *t*<sub>major</sub> = 11.3 min. The absolute configurations were determined by comparing the sign of the optical rotation with that reported.<sup>12</sup>

#### (*R, E*)-1-methyl-2-(4-phenylbut-3-en-2-yl)benzene (**3b**)<sup>12</sup>

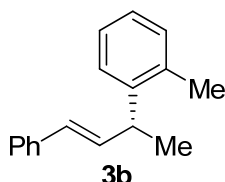

Colorless oil; <sup>1</sup>H NMR (400 MHz, CDCl<sub>3</sub>): δ 7.35–7.10 (m, 9H), 6.37–6.35 (m, 2H), 3.89–3.82 (m, 1H), 2.37 (s, 3H), 1.44 (d, *J* = 6.8 Hz, 3H); <sup>13</sup>C NMR (100 MHz, CDCl<sub>3</sub>): δ 134.5, 137.6, 135.6, 134.8, 130.4, 128.5, 128.4, 127.0, 126.3, 126.2, 126.1, 126.0, 38.0, 20.4, 19.5; [α]<sub>D</sub><sup>25</sup> = +32.7 (*c* = 1.47, CHCl<sub>3</sub>); 94% ee; [lit.<sup>12</sup> [α]<sub>D</sub><sup>20</sup> = +38.9 (*c* = 0.55, CHCl<sub>3</sub>), 96% ee]; HPLC conditions: Chiralcel OD-H column, 254 nm, flow rate: 1.0 ml/min, *i*-PrOH/hexane = 0.1/99.9, *t*<sub>major</sub> = 8.9 min, *t*<sub>minor</sub> = 7.9 min.

#### (*R, E*)-1-methoxy-3-(4-phenylbut-3-en-2-yl)benzene (**3c**)<sup>12</sup>

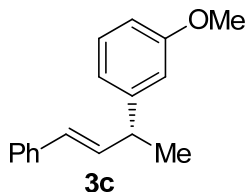

Colorless oil; <sup>1</sup>H NMR (400 MHz, CDCl<sub>3</sub>): δ 7.36 – 7.17 (m, 6H), 6.88–6.74 (m, 3H), 6.44–6.34 (m, 2H), 3.80 (s, 3H), 3.61 (dq, *J* = 7.2, 6.8 Hz, 1H), 1.45 (d, *J* = 7.2 Hz, 3H); <sup>13</sup>C NMR (100 MHz, CDCl<sub>3</sub>): δ 159.7, 147.3, 137.5, 135.0, 129.4, 128.5, 128.4, 127.0, 126.1, 119.7, 113.3, 111.2, 55.1, 42.6, 21.1; [α]<sub>D</sub><sup>25</sup> = +8.5 (*c* = 0.45, CHCl<sub>3</sub>);

95% ee; [lit.<sup>12</sup>  $[\alpha]_D^{20} = +10$  ( $c = 0.28$ ,  $\text{CHCl}_3$ ), 92% ee]; HPLC conditions: Chiralcel OJ-H column, 254 nm, flow rate: 1 ml/min,  $i$ -PrOH/hexane = 10/90,  $t_{\text{major}} = 8.2$  min,  $t_{\text{minor}} = 9.5$  min.

**(*R,E*)-1-methyl-4-(4-phenylbut-3-en-2-yl)benzene (3d)<sup>14</sup>**

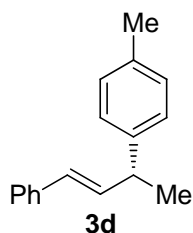

Colorless oil; <sup>1</sup>H NMR (400 MHz,  $\text{CDCl}_3$ ):  $\delta$  7.36–7.15 (m, 9H), 6.43–6.34 (m, 2H), 3.61 (dq,  $J = 6.8, 6.8$  Hz, 1H), 2.33 (s, 3H), 1.46 (d,  $J = 7.2$  Hz, 3H); <sup>13</sup>C NMR (100 MHz,  $\text{CDCl}_3$ ):  $\delta$  142.6, 137.6, 135.7, 135.4, 129.1, 128.4, 128.3, 127.2, 127.0, 126.1, 42.1, 21.25, 21.0;  $[\alpha]_D^{20} = +39.8$  ( $c = 0.42$ ,  $\text{CHCl}_3$ ); 95% ee; HPLC conditions: Chiralcel OJ-H column, 254 nm, flow rate: 1 ml/min,  $i$ -PrOH/hexane = 15/85,  $t_{\text{major}} = 6.4$  min,  $t_{\text{minor}} = 5.9$  min.

**(*R,E*)-1-(tert-butyl)-4-(4-phenylbut-3-en-2-yl)benzene (3e)**

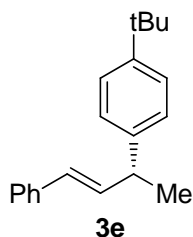

Colorless oil; <sup>1</sup>H NMR (400 MHz,  $\text{CDCl}_3$ ):  $\delta$  7.38–7.17 (m, 9H), 6.45–6.34 (m, 2H), 3.62 (dq,  $J = 6.8, 6.8$  Hz, 1H), 1.46 (d,  $J = 7.2$  Hz, 3H), 1.31 (s, 9H); <sup>13</sup>C NMR (100 MHz,  $\text{CDCl}_3$ ):  $\delta$  148.9, 142.5, 137.6, 135.4, 128.4, 128.2, 126.9, 126.8, 126.1, 125.3, 42.1, 34.4, 31.4, 21.1;  $[\alpha]_D^{15} = +20.2$  ( $c = 0.92$ ,  $\text{CHCl}_3$ ); 95% ee; HPLC conditions: Chiralcel OD-H column, 254 nm, flow rate: 1 ml/min,  $i$ -PrOH/hexane = 0.1/99.9,  $t_{\text{major}} = 7.4$  min,  $t_{\text{minor}} = 6.7$  min.

**(*R,E*)-1-methoxy-4-(4-phenylbut-3-en-2-yl)benzene(3f)<sup>12</sup>**

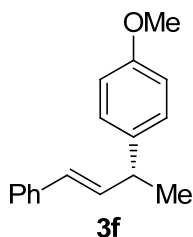

Colorless oil; <sup>1</sup>H NMR (400 MHz,  $\text{CDCl}_3$ ):  $\delta$  7.36–7.16 (m, 7H), 6.88–6.84 (m, 2H), 6.41–6.32 (m, 2H), 3.79 (s, 3H), 3.60 (dq,  $J = 7.2, 6.8$  Hz, 1H), 1.44 (d,  $J = 7.2$  Hz, 3H); <sup>13</sup>C NMR (100 MHz,  $\text{CDCl}_3$ ):  $\delta$  137.7, 137.6, 135.6, 128.5, 128.2, 127.0, 126.1, 113.8, 55.3, 41.7, 21.3;  $[\alpha]_D^{20} = +11.3$  ( $c = 0.51$ ,  $\text{CHCl}_3$ ); 94% ee; [lit.<sup>12</sup>  $[\alpha]_D^{20} = +36.1$  ( $c = 0.29$ ,  $\text{CHCl}_3$ ), 94% ee]; HPLC conditions: Chiralcel OJ-H column, 254 nm, flow rate: 1 ml/min,  $i$ -PrOH/hexane = 10/90,  $t_{\text{major}} = 10.0$  min,  $t_{\text{minor}} = 9.4$  min.

**(*R,E*)-1-chloro-4-(4-phenylbut-3-en-2-yl)benzene (3g)<sup>12</sup>**

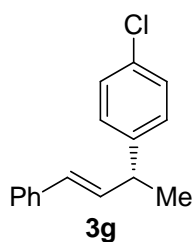

Colorless oil;  $^1\text{H}$  NMR (400 MHz,  $\text{CDCl}_3$ ):  $\delta$  7.36–7.19 (m, 9H), 6.42–6.30 (m, 2H), 3.62 (dq,  $J = 6.8, 6.8$  Hz, 1H), 1.44 (d,  $J = 7.2$  Hz, 3H);  $^{13}\text{C}$  NMR (100 MHz,  $\text{CDCl}_3$ ):  $\delta$  144.0, 137.3, 134.5, 131.8, 128.8, 128.7, 128.5, 128.5, 127.2, 126.1, 41.9, 21.1;  $[\alpha]_{\text{D}}^{25} = +23.4$  ( $c = 0.60$ ,  $\text{CHCl}_3$ ); 89% ee; [lit.<sup>12</sup>  $[\alpha]_{\text{D}}^{20} = +14.2$  ( $c = 0.75$ ,  $\text{CHCl}_3$ ), 93% ee]; HPLC conditions: Chiralcel OJ-H column, 254 nm, flow rate: 1 ml/min, *i*-PrOH/hexane = 1/99,  $t_{\text{major}} = 12.5$  min,  $t_{\text{minor}} = 11.3$  min.

**(R, E)-2-(4-phenylbut-3-en-2-yl)naphthalene (3h)**<sup>12</sup>

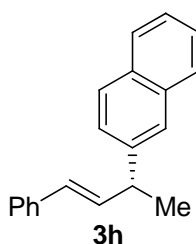

Off-white solid, m.p. 72 °C;  $^1\text{H}$  NMR (400 MHz,  $\text{CDCl}_3$ ):  $\delta$  7.97–7.87 (m, 1H), 7.81–7.78 (m, 3H), 7.69 (s, 1H), 7.45–7.17 (m, 7H), 6.46–6.45 (m, 2H), 3.83–3.70 (m, 1H), 1.55 (d,  $J = 7.2$  Hz, 3H);  $^{13}\text{C}$  NMR (100 MHz,  $\text{CDCl}_3$ ):  $\delta$  143.0, 137.5, 135.1, 133.6, 132.2, 128.8, 128.5, 128.0, 127.6, 127.6, 127.1, 126.3, 126.2, 125.9, 125.3, 125.2, 42.6, 21.1;  $[\alpha]_{\text{D}}^{25} = +21.0$  ( $c = 0.40$ ,  $\text{CHCl}_3$ ); 94% ee; [lit.<sup>12</sup>  $[\alpha]_{\text{D}}^{20} = +13.1$  ( $c = 0.17$ ,  $\text{CHCl}_3$ ), 93% ee]; HPLC conditions: Chiralcel OD-H column, 254 nm, flow rate: 1.0 ml/min, *i*-PrOH/hexane = 0.1/99.9,  $t_{\text{major}} = 24.2$  min,  $t_{\text{minor}} = 23.1$  min.

**(R, E)-hept-1-ene-1,3-diylidibenzene (3i)**<sup>12</sup>

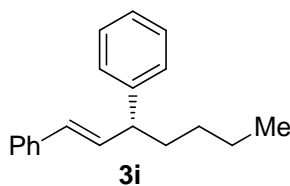

Colorless oil;  $^1\text{H}$  NMR (400 MHz,  $\text{CDCl}_3$ ):  $\delta$  7.36–7.16 (m, 10H), 6.41–6.30 (m, 2H), 3.39 (dt,  $J = 7.2, 7.2$  Hz), 1.83–1.76 (m, 2H), 1.37–1.20 (m, 4H), 0.87 (t,  $J = 7.2$  Hz, 3H);  $^{13}\text{C}$  NMR (100 MHz,  $\text{CDCl}_3$ ):  $\delta$  134.5, 129.2, 128.4, 128.4, 127.6, 127.0, 126.1, 126.1, 49.2, 35.6, 29.8, 22.7, 14.0;  $[\alpha]_{\text{D}}^{16} = +15.3$  ( $c = 0.76$ ,  $\text{CHCl}_3$ ); 94% ee; [lit.<sup>12</sup>  $[\alpha]_{\text{D}}^{20} = +17.4$  ( $c = 0.46$ ,  $\text{CHCl}_3$ ), 95% ee]; HPLC conditions: Chiralcel OD-H column, 254 nm, flow rate: 1.0 ml/min, *i*-PrOH/hexane = 0.1/99.9,  $t_{\text{major}} = 8.1$  min,  $t_{\text{minor}} = 7.7$  min.

**(R, E)-pent-1-ene-1,3,5-triyltribenzene (3j)**<sup>12</sup>

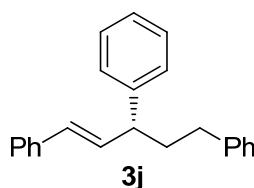

Colorless oil;  $^1\text{H}$  NMR (400 MHz,  $\text{CDCl}_3$ ):  $\delta$  7.35–7.15 (m, 15H), 6.43–6.31 (m, 2H), 3.45 (dt,  $J = 7.2, 7.6$  Hz, 1H), 2.69–2.55 (m, 2H), 2.15 (dt,  $J = 8.4, 7.2$  Hz, 2H);  $^{13}\text{C}$  NMR (100 MHz,  $\text{CDCl}_3$ ):  $\delta$  134.0, 129.7, 128.6, 128.4, 128.3, 127.7, 127.1, 126.3, 126.1, 125.8, 48.5, 37.3, 33.7;  $[\alpha]_{\text{D}}^{20} = -9.0$  ( $c = 1.06$ ,  $\text{CHCl}_3$ ); 91% ee; [lit.<sup>12</sup>  $[\alpha]_{\text{D}}^{20} = -4.5$  ( $c = 0.45$ ,  $\text{CHCl}_3$ ), 97% ee]; HPLC conditions: Chiralcel OD-H column, 254 nm, flow rate: 1.0 ml/min,  $i\text{-PrOH/hexane} = 0.5/99.5$ ,  $t_{\text{major}} = 11.4$  min,  $t_{\text{minor}} = 10.5$  min.

**(*R,E*)-1-methyl-4-(3-phenylbut-1-en-1-yl)benzene(3k)**<sup>15</sup>

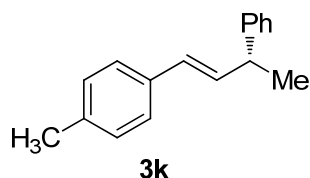

Colorless oil;  $^1\text{H}$  NMR (400 MHz,  $\text{CDCl}_3$ ):  $\delta$  7.33–7.19 (m, 7H), 7.10–7.08 (m, 2H), 6.41–6.30 (m, 2H), 3.63 (dq,  $J = 7.2, 6.4$  Hz, 1H), 2.32 (s, 3H), 1.46 (d,  $J = 7.2$  Hz, 3H);  $^{13}\text{C}$  NMR (100 MHz,  $\text{CDCl}_3$ ):  $\delta$  145.8, 136.7, 134.7, 134.2, 129.2, 128.4, 128.3, 127.3, 126.1, 126.0, 42.5, 21.3, 21.1;  $[\alpha]_{\text{D}}^{20} = +38.4$  ( $c = 0.98$ ,  $\text{CHCl}_3$ ); 91% ee; HPLC conditions: Chiralcel OJ-H column, 254 nm, flow rate: 1 ml/min,  $i\text{-PrOH/hexane} = 10/90$ ,  $t_{\text{major}} = 11.6$  min,  $t_{\text{minor}} = 14.3$  min.

**(*R,E*)-(4-cyclohexylbut-3-en-2-yl)benzene(3l)**<sup>12</sup>

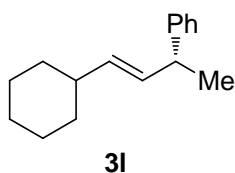

Colorless oil;  $^1\text{H}$  NMR (400 MHz,  $\text{CDCl}_3$ ):  $\delta$  7.30–7.12 (m, 5H), 5.55 (ddd,  $J = 15.6, 6.8, 0.8$  Hz, 1H), 5.41 (dd,  $J = 15.6, 6.0$  Hz, 1H), 3.40 (dq,  $J = 7.2, 6.8$  Hz, 1H), 1.96–1.89 (m, 1H), 1.74–1.67 (m, 4H), 1.32 (d,  $J = 7.2$  Hz, 3H), 1.27–1.01 (m, 6H);  $^{13}\text{C}$  NMR (100 MHz,  $\text{CDCl}_3$ ):  $\delta$  135.2, 132.3, 128.3, 127.9, 127.1, 125.8, 42.2, 40.6, 33.18, 33.17, 26.2, 26.1, 21.6;  $[\alpha]_{\text{D}}^{22} = +8.0$  ( $c = 0.50$ ,  $\text{CHCl}_3$ ); 93% ee; [lit.<sup>12</sup>  $[\alpha]_{\text{D}}^{20} = +10.1$  ( $c = 0.45$ ,  $\text{CHCl}_3$ ), 95% ee]; HPLC conditions: Chiralcel OJ-H column, 254 nm, flow rate: 0.4 ml/min,  $i\text{-PrOH/hexane} = 0/100$ ,  $t_{\text{major}} = 11.7$  min,  $t_{\text{minor}} = 12.8$  min.

**(*R,E*)-hex-4-ene-1,3-diyl dibenzene(3m) + (*S,E*)-hex-3-ene-1,5-diyl dibenzene(3n)**<sup>12,16</sup>

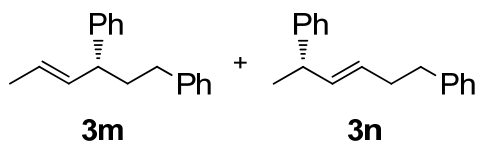

Compounds **3m** and **3n** are inseparable mixture isolated in 91% yield with a ratio **3m:3n** = 42:58 by  $^1\text{H}$  NMR analysis. Pure racemic **3m** and **3n** can be synthesized by the method described in the literature.<sup>16</sup>

For **3m**,  $^1\text{H}$  NMR (400 MHz,  $\text{CDCl}_3$ )  $\delta$  7.32–7.14 (m, 10H), 5.63–5.59 (m, 1H), 5.47–5.40 (m, 1H), 3.22 (dt,  $J = 8.0, 7.2$  Hz, 1H), 2.61–2.47 (m, 2H), 2.00 (dt,  $J = 8.4, 7.2$ , 2H), 1.68–1.66 (m, 3H);  $^{13}\text{C}$  NMR (100 MHz,  $\text{CDCl}_3$ ):  $\delta$  145.0, 142.4, 134.9, 128.43, 128.41, 128.2, 127.5, 126.0, 125.6, 125.0, 48.4, 37.6, 33.8, 18.0.

For **3n**,  $^1\text{H}$  NMR (400 MHz,  $\text{CDCl}_3$ )  $\delta$  7.30–7.13 (m, 10H), 5.60–5.56 (m, 1H), 5.52–5.49 (m, 1H), 3.40 (dq,  $J = 7.2, 7.2$  Hz, 1H), 2.70–2.63 (m, 2H), 2.36–2.31 (m, 2H), 1.31 (d,  $J = 7.2$  Hz, 3H);  $^{13}\text{C}$  NMR (100 MHz,  $\text{CDCl}_3$ ):  $\delta$  146.3, 142.0, 135.7, 128.5, 128.3, 128.2, 127.1, 125.9, 125.7, 42.2, 36.0, 34.4, 21.4.



HPLC conditions for **3m** and **3n**: Chiralcel OJ-H column, 220 nm, flow rate: 0.75 ml/min, *i*-PrOH/hexane = 0.3/99.7.  $t_{\text{major}}$  (**3m**) = 13.9 min,  $t_{\text{minor}}$  (**3m**) = 15.3 min, 96%ee;  $t_{\text{major}}$  (**3n**) = 19.3 min,  $t_{\text{minor}}$  (**3n**) = 18.0 min, 97% ee.

## References

1. W. C. Still, M. Kahn and A. Mitra, *J. Org. Chem.*, 1978, **43**, 2923.
2. B. Martin-Matute, K. Bogar, M. Edin, F. B. Kaynak and J. E. Bäckvall, *Chem. Eur. J.*, 2005, **11**, 5832.
3. B. M. Trost and R. J. Kulawiec, *J. Am. Chem. Soc.*, 1993, **115**, 2027.
4. I. D. G. Watson, S. A. Styler and A. K. Yudin, *J. Am. Chem. Soc.*, 2004, **126**, 5086.
5. M. Dobmeier, J. M. Herrmann, D. Lenoir and B. König, *Beilstein J. Org. Chem.*, 2012, **8**, 330.
6. K. Zumbansen, A. Dohring and B. List, *Adv. Synth. Catal.*, 2010, **352**, 1135.
7. (a) M. Sasaki, H. Ikemoto, M. Kawahata, K. Yamaguchi and K. Takeda, *Chem. Eur. J.*, 2009, **15**, 4663; (b) P. R. Carlier, W. S. Mungall, G. Sohröder and K. B. Sharpless, *J. Am. Chem. Soc.*, 1988, **110**, 2978.
8. C. Quirin and U. Kazmaier, *Synthesis*, 2009, **10**, 1725.
9. M. Node, K. Nishide, Y. Shigeta, H. Shiraka and K. Obata, *J. Am. Chem. Soc.*, 2000, **122**, 1927.
10. Y. Liu, C.-S. Da, S.-L. Yu, X.-G. Yin, J.-R. Wang, X.-Y. Fan, W.-P. Li and R. Wang, *J. Org. Chem.*, 2010, **75**, 6869.
11. S. R. Goudreau and A. B. Charette, *J. Am. Chem. Soc.*, 2009, **131**, 15633.
12. (a) J. Zhao, J. Ye and Y.-J. Zhang, *Adv. Synth. Catal.*, 2013, **355**, 491; (b) C. Li, J. Xing, J. Zhao, P. Huynh, W. Zhang, P. Jiang and Y. J. Zhang, *Org. Lett.*, 2012, **14**, 390.
13. S. Akai, R. Hanada, N. Fujiwara, Y. Kita and M. Egi, *Org. Lett.*, 2010, **12**, 4900.
14. R. Riveiros, R. Tato, J. P. Sestelo and L. A. Sarandeses, *Eur. J. Org. Chem.*, 2012, **15**, 3018.
15. H. Horibe, Y. Fukuda, K. Kondo, H. Okuno, Y. Murakami and T. Aoyama, *Tetrahedron*, 2004, **60**, 10701.
16. H. Ohmiya, Y. Makida, T. Tanaka and M. Sawamura, *J. Am. Chem. Soc.*, 2008, **130**, 17276.

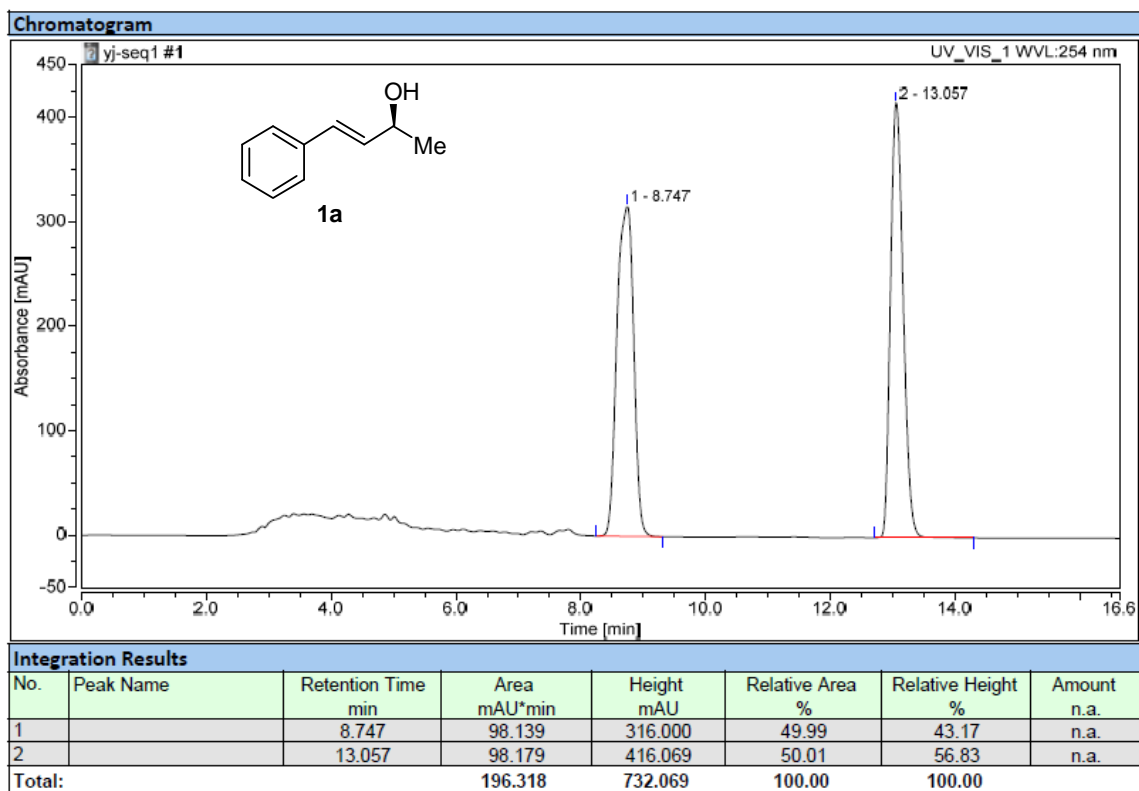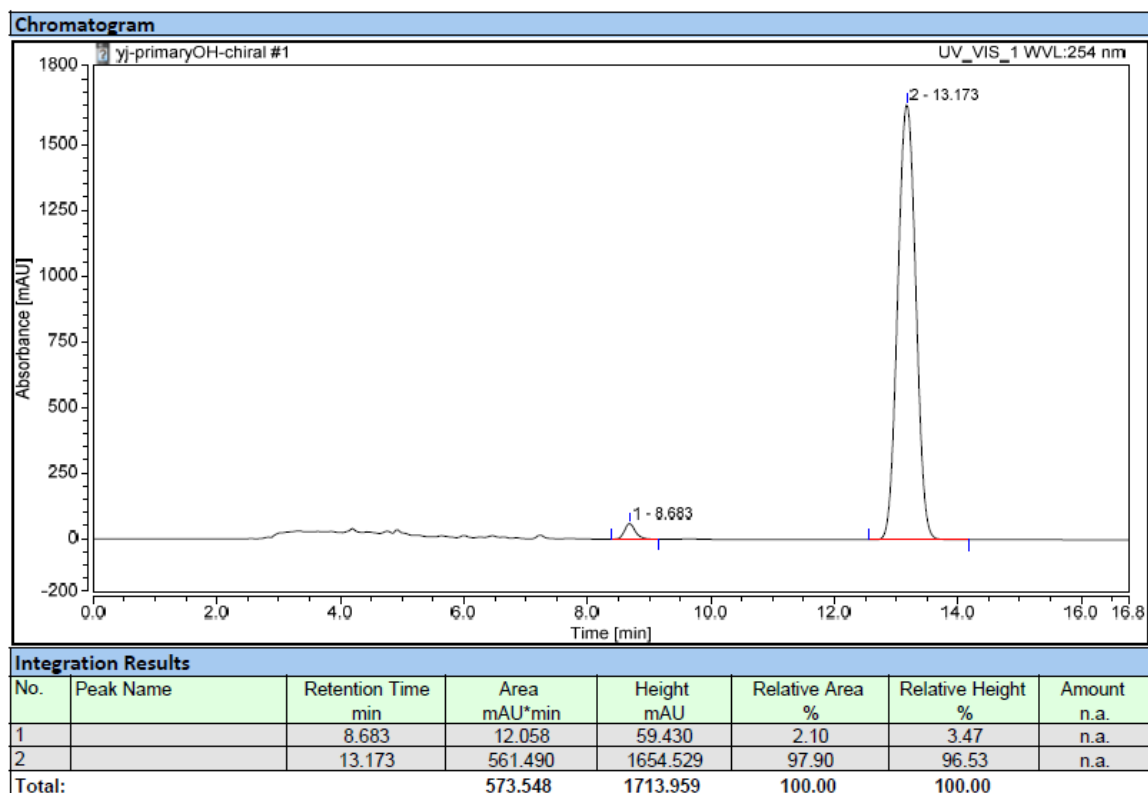

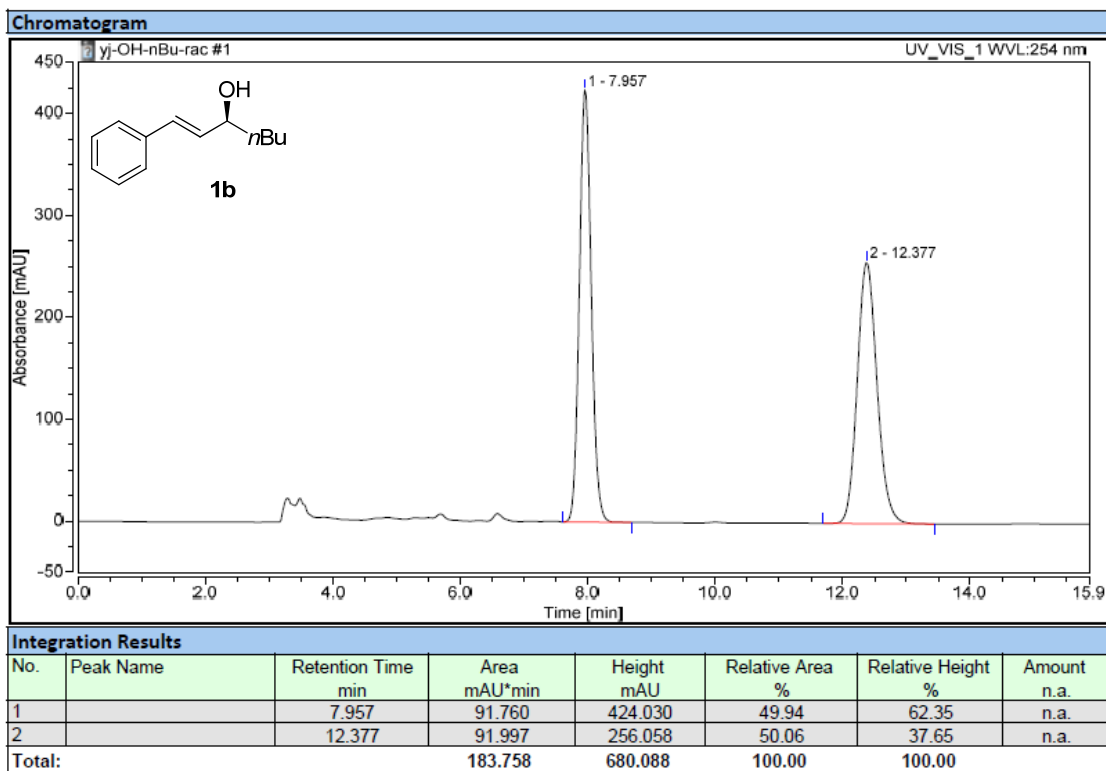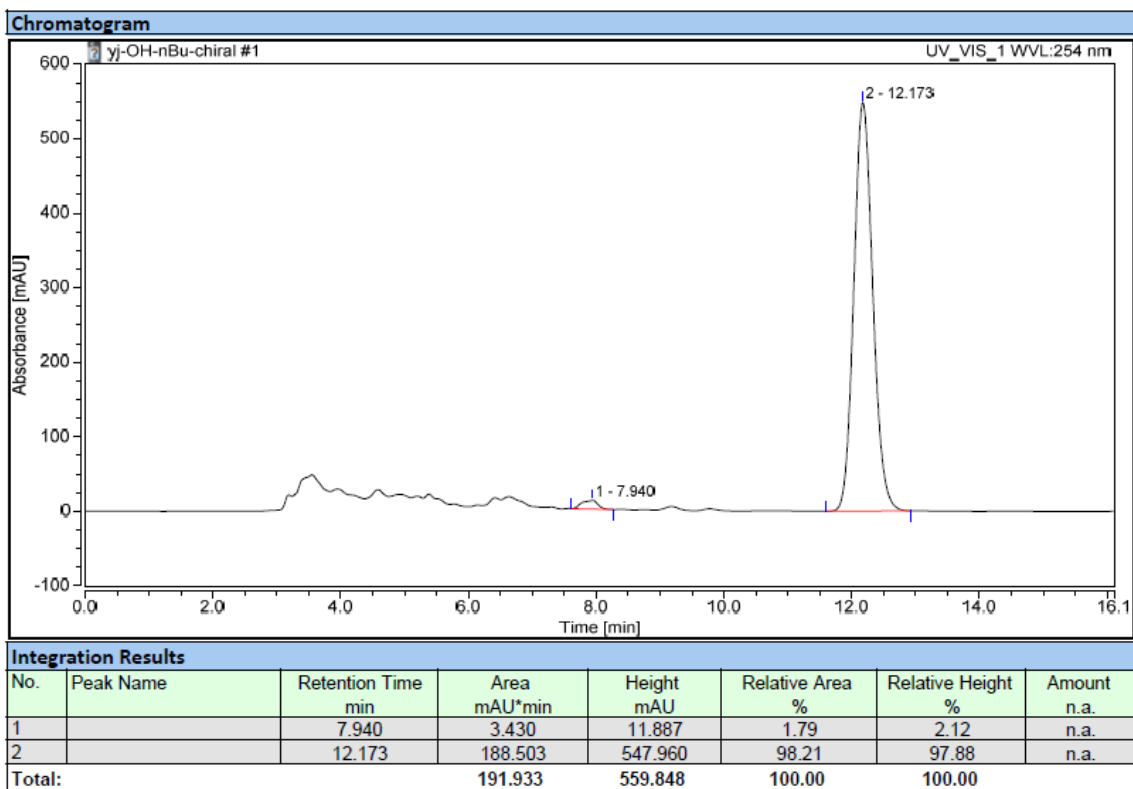

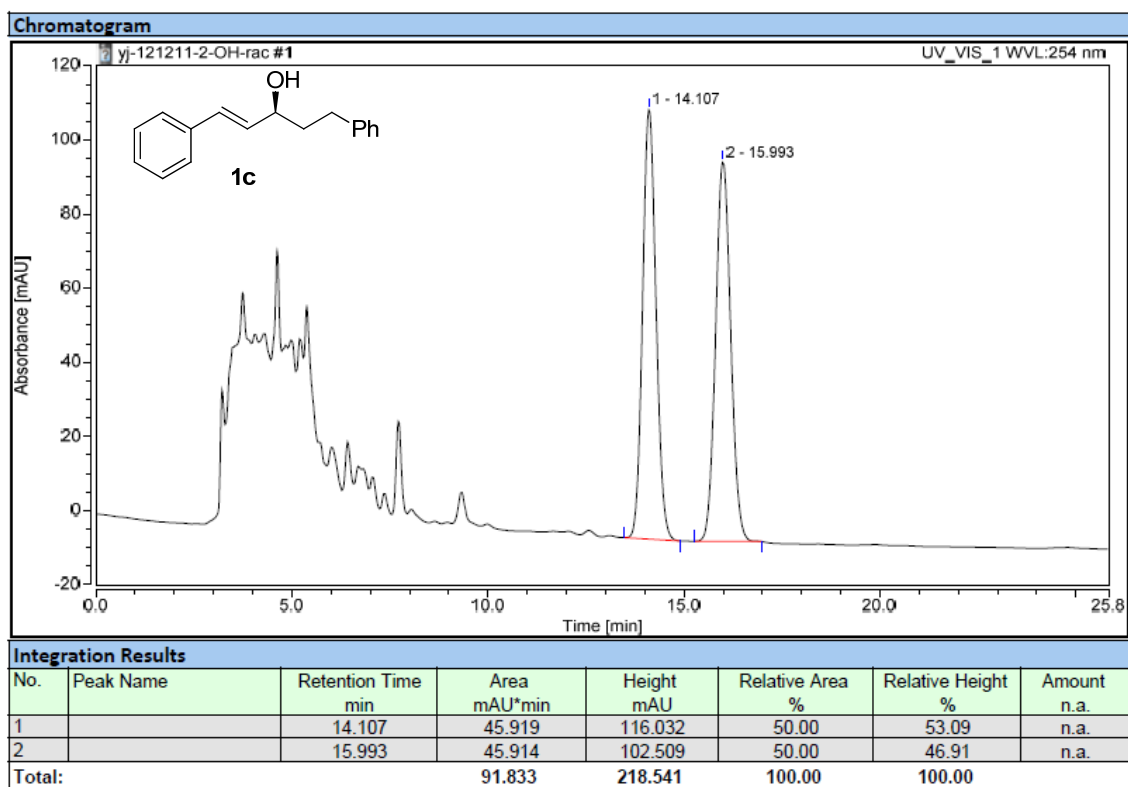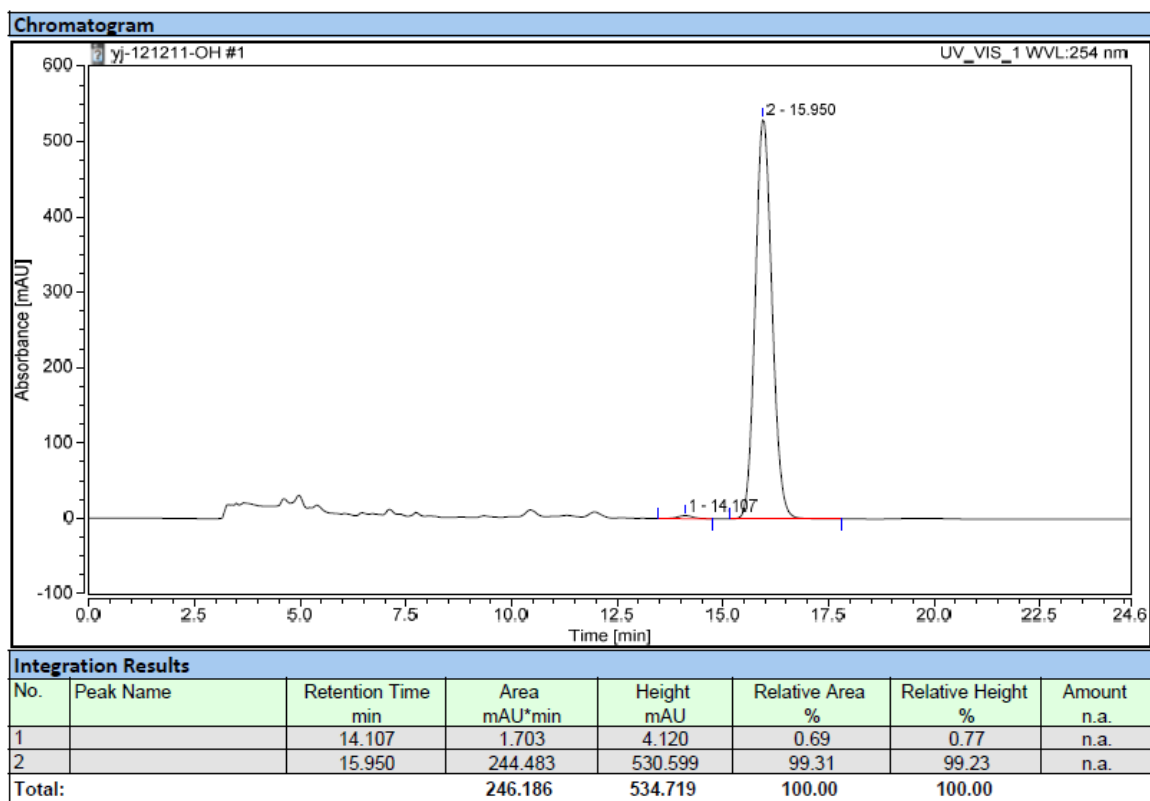

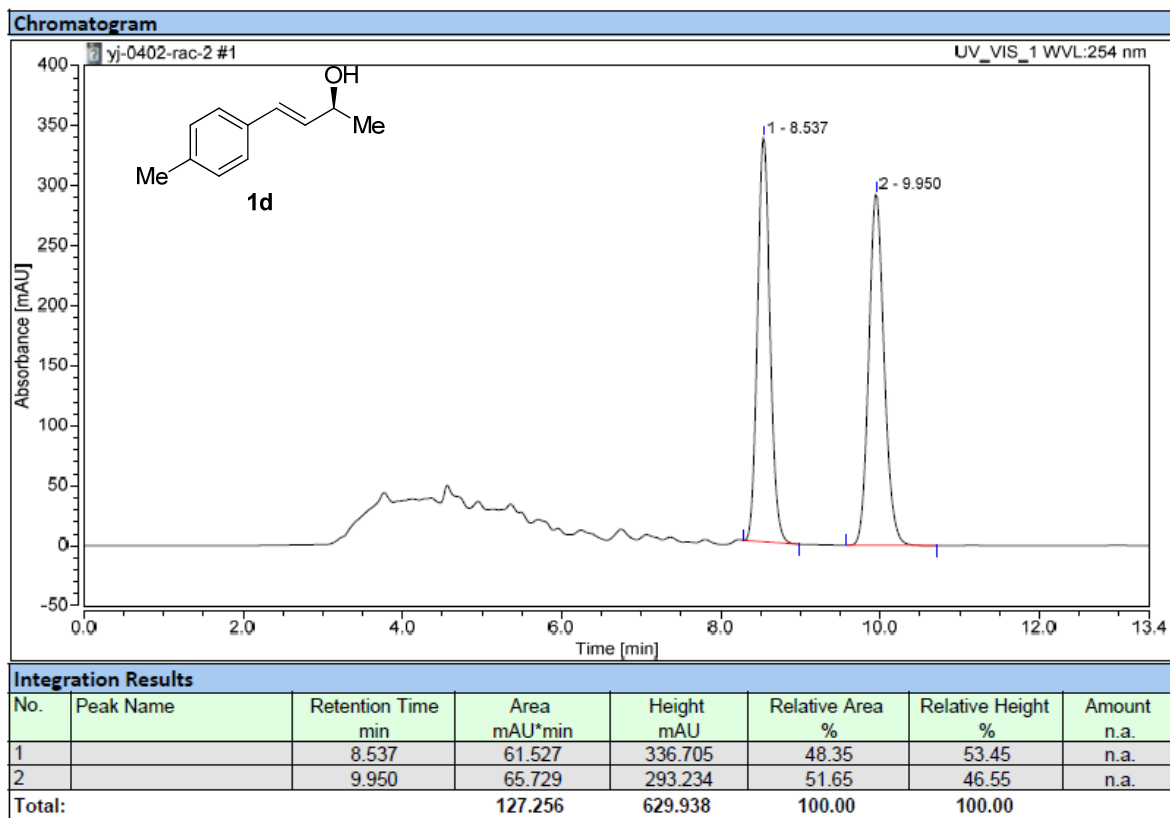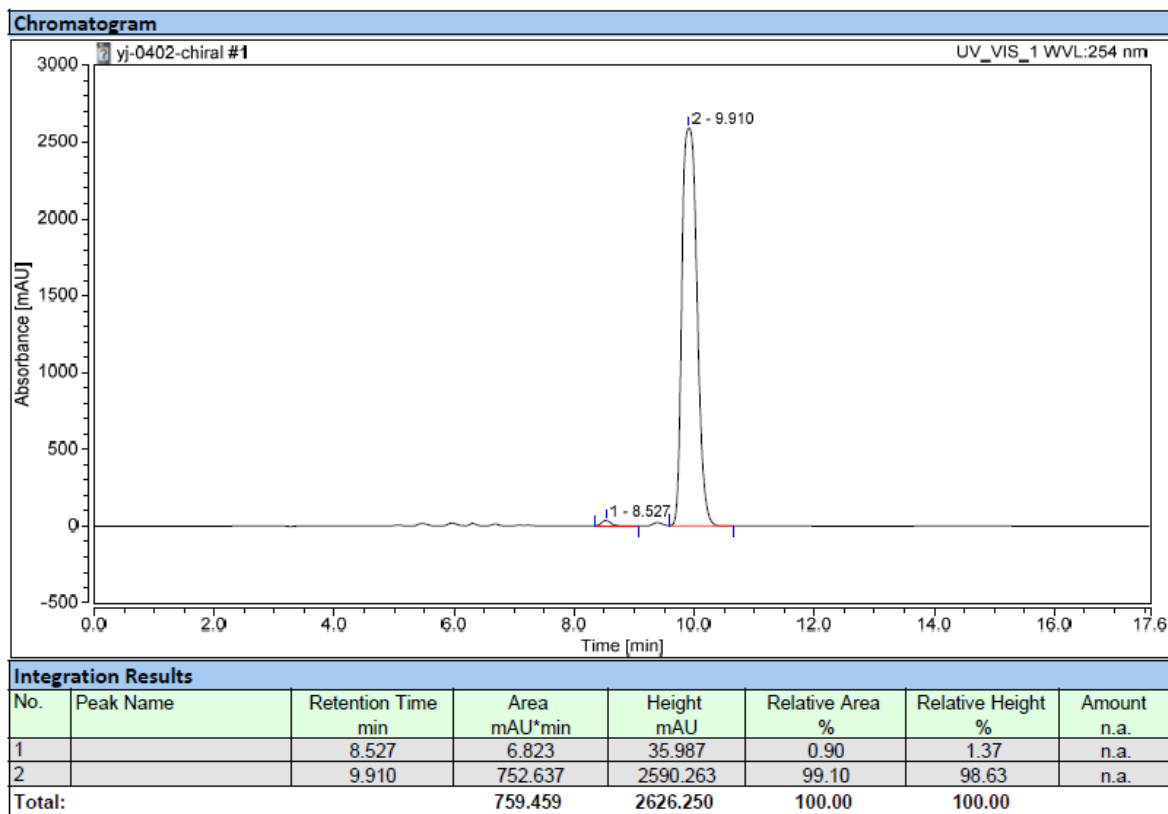

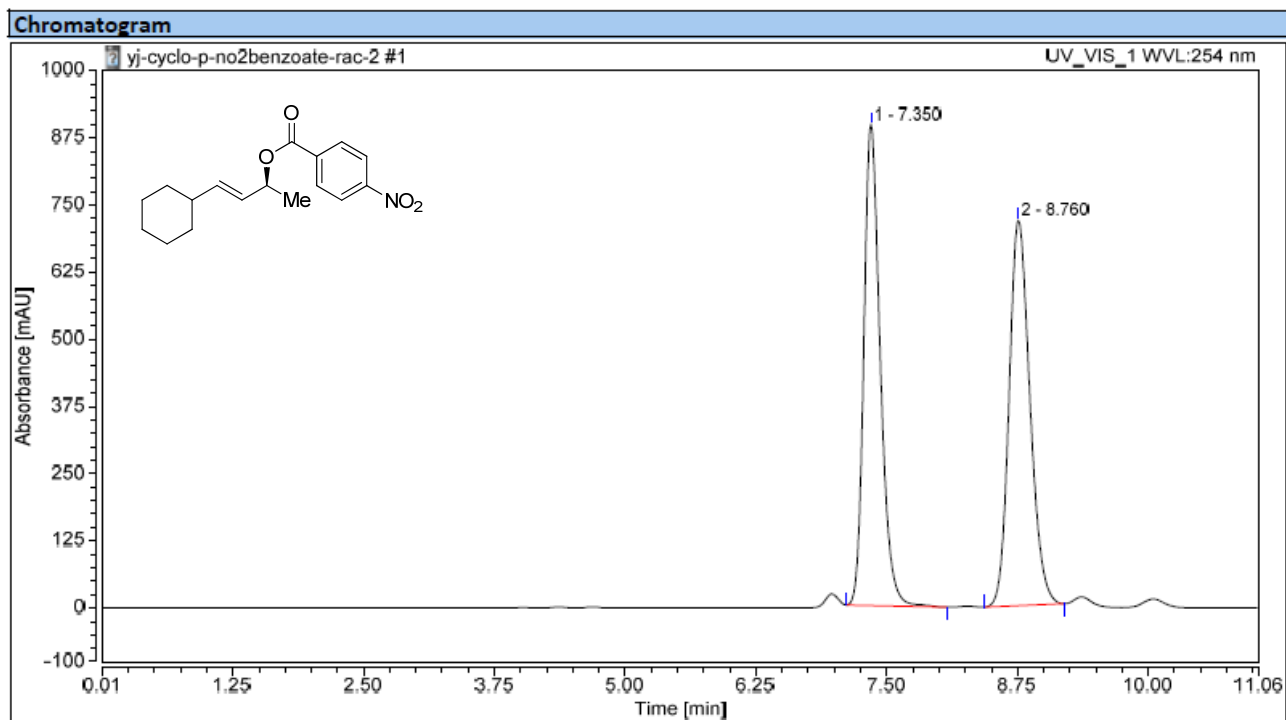

**Integration Results**

| No.           | Peak Name | Retention Time min | Area mAU*min   | Height mAU      | Relative Area % | Relative Height % | Amount n.a. |
|---------------|-----------|--------------------|----------------|-----------------|-----------------|-------------------|-------------|
| 1             |           | 7.350              | 162.617        | 894.766         | 49.59           | 55.49             | n.a.        |
| 2             |           | 8.760              | 165.330        | 717.618         | 50.41           | 44.51             | n.a.        |
| <b>Total:</b> |           |                    | <b>327.948</b> | <b>1612.384</b> | <b>100.00</b>   | <b>100.00</b>     |             |

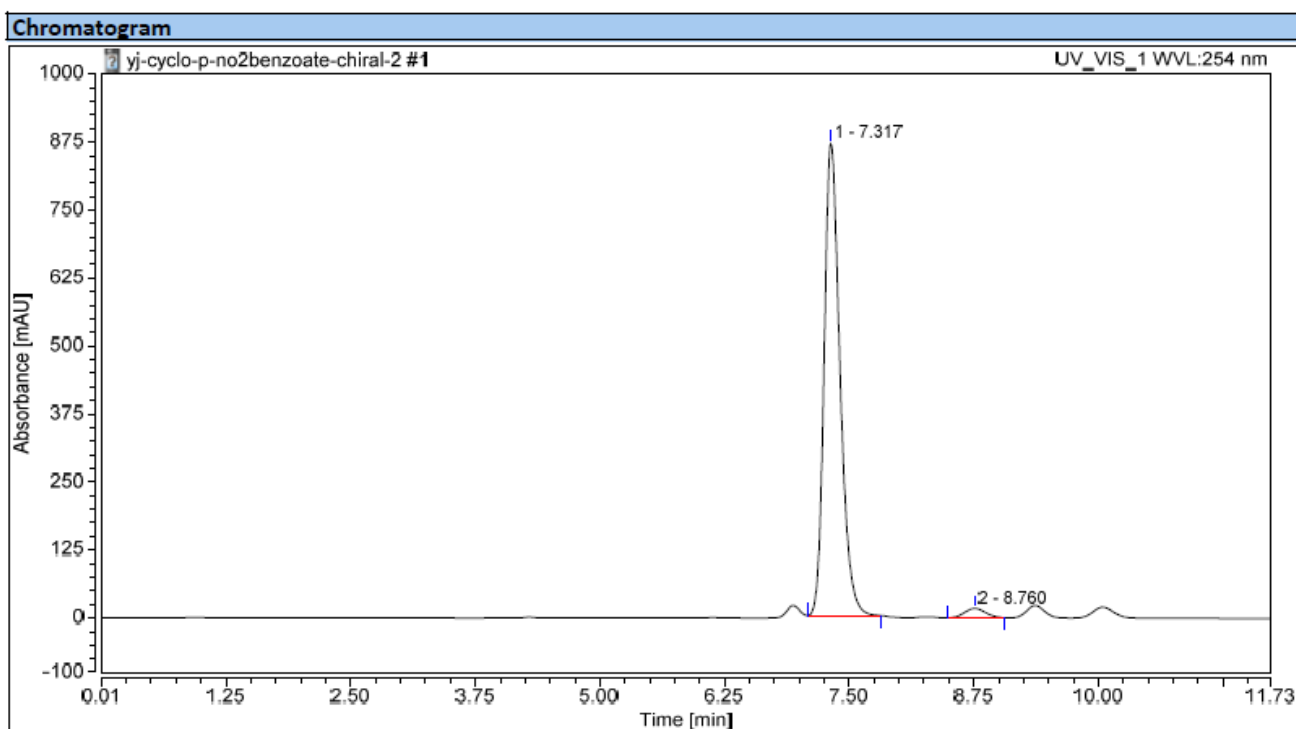

**Integration Results**

| No.           | Peak Name | Retention Time min | Area mAU*min   | Height mAU     | Relative Area % | Relative Height % | Amount n.a. |
|---------------|-----------|--------------------|----------------|----------------|-----------------|-------------------|-------------|
| 1             |           | 7.317              | 159.903        | 869.579        | 97.46           | 98.05             | n.a.        |
| 2             |           | 8.760              | 4.172          | 17.271         | 2.54            | 1.95              | n.a.        |
| <b>Total:</b> |           |                    | <b>164.076</b> | <b>886.851</b> | <b>100.00</b>   | <b>100.00</b>     |             |

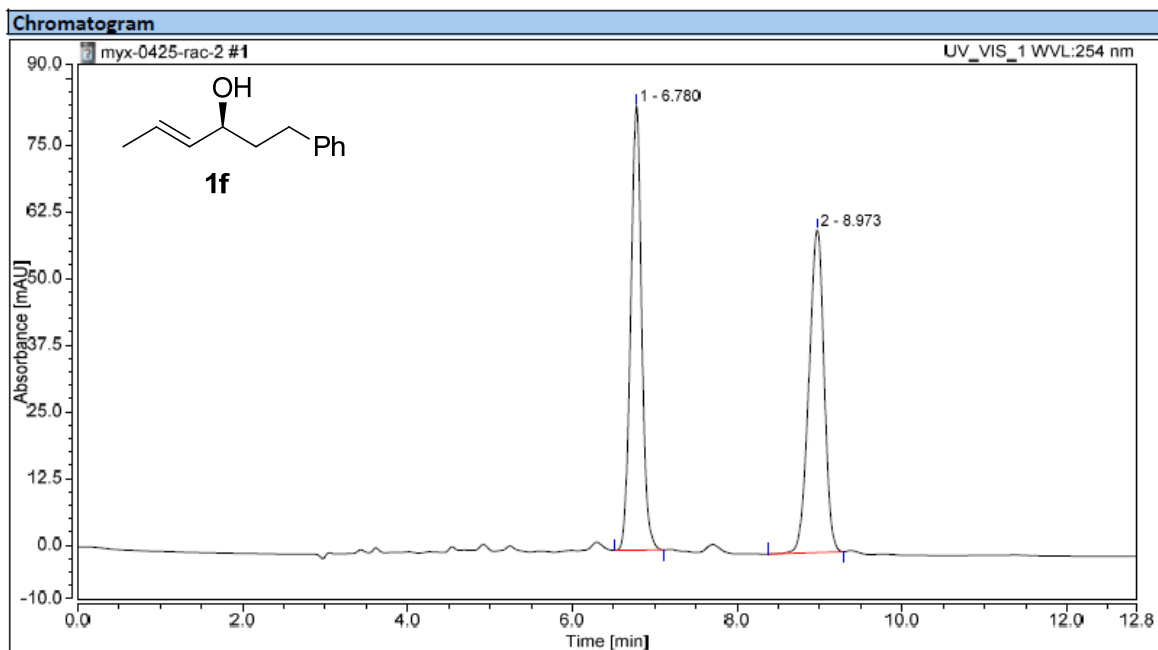

**Integration Results**

| No.           | Peak Name | Retention Time<br>min | Area<br>mAU*min | Height<br>mAU  | Relative Area<br>% | Relative Height<br>% | Amount<br>n.a. |
|---------------|-----------|-----------------------|-----------------|----------------|--------------------|----------------------|----------------|
| 1             |           | 6.780                 | 12.874          | 83.234         | 50.00              | 57.96                | n.a.           |
| 2             |           | 8.973                 | 12.875          | 60.380         | 50.00              | 42.04                | n.a.           |
| <b>Total:</b> |           |                       | <b>25.749</b>   | <b>143.614</b> | <b>100.00</b>      | <b>100.00</b>        |                |

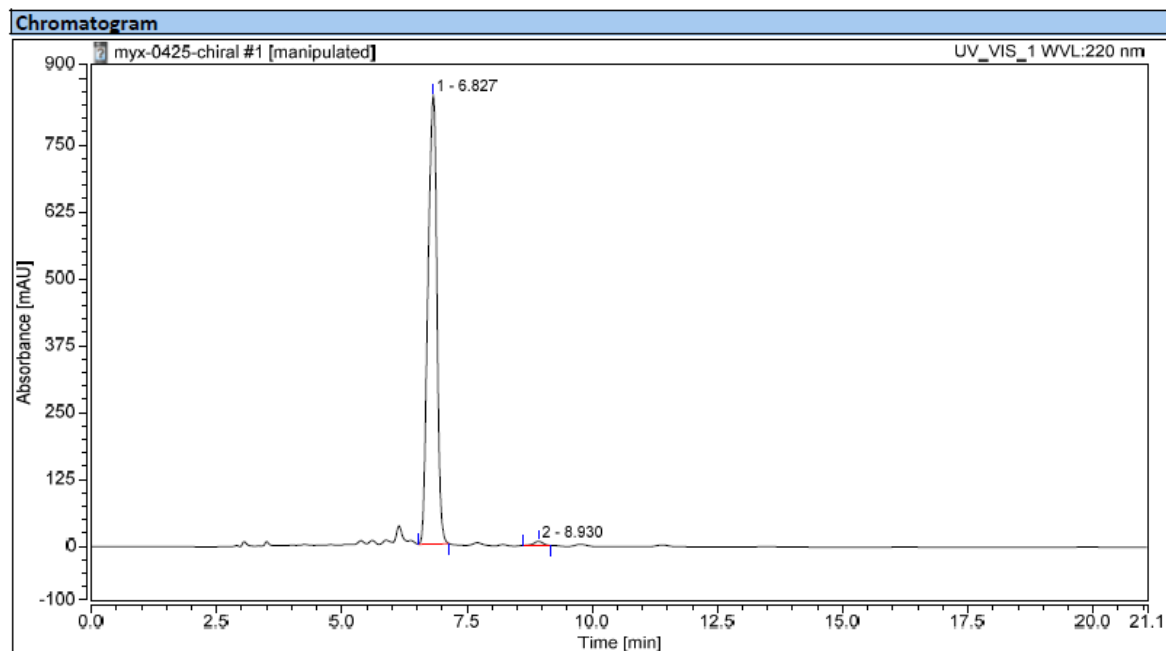

**Integration Results**

| No.           | Peak Name | Retention Time<br>min | Area<br>mAU*min | Height<br>mAU  | Relative Area<br>% | Relative Height<br>% | Amount<br>n.a. |
|---------------|-----------|-----------------------|-----------------|----------------|--------------------|----------------------|----------------|
| 1             |           | 6.827                 | 173.803         | 836.900        | 99.08              | 99.08                | n.a.           |
| 2             |           | 8.930                 | 1.619           | 7.761          | 0.92               | 0.92                 | n.a.           |
| <b>Total:</b> |           |                       | <b>175.422</b>  | <b>844.661</b> | <b>100.00</b>      | <b>100.00</b>        |                |

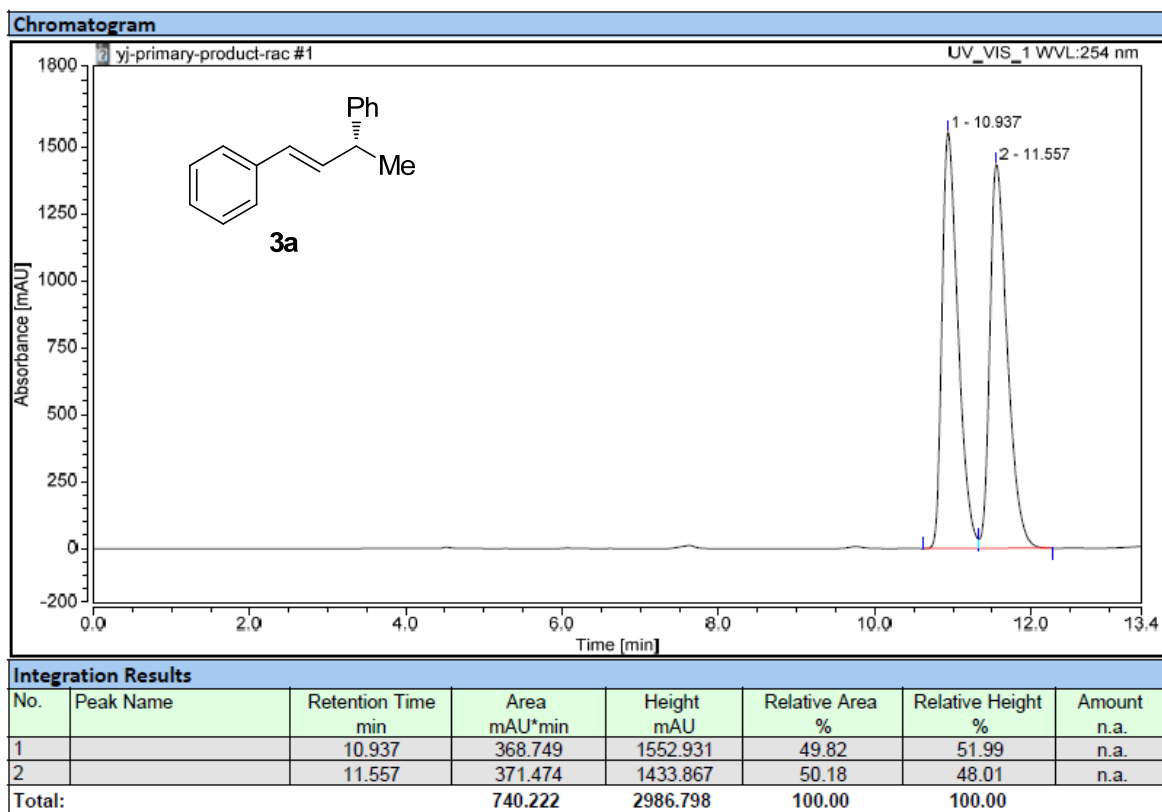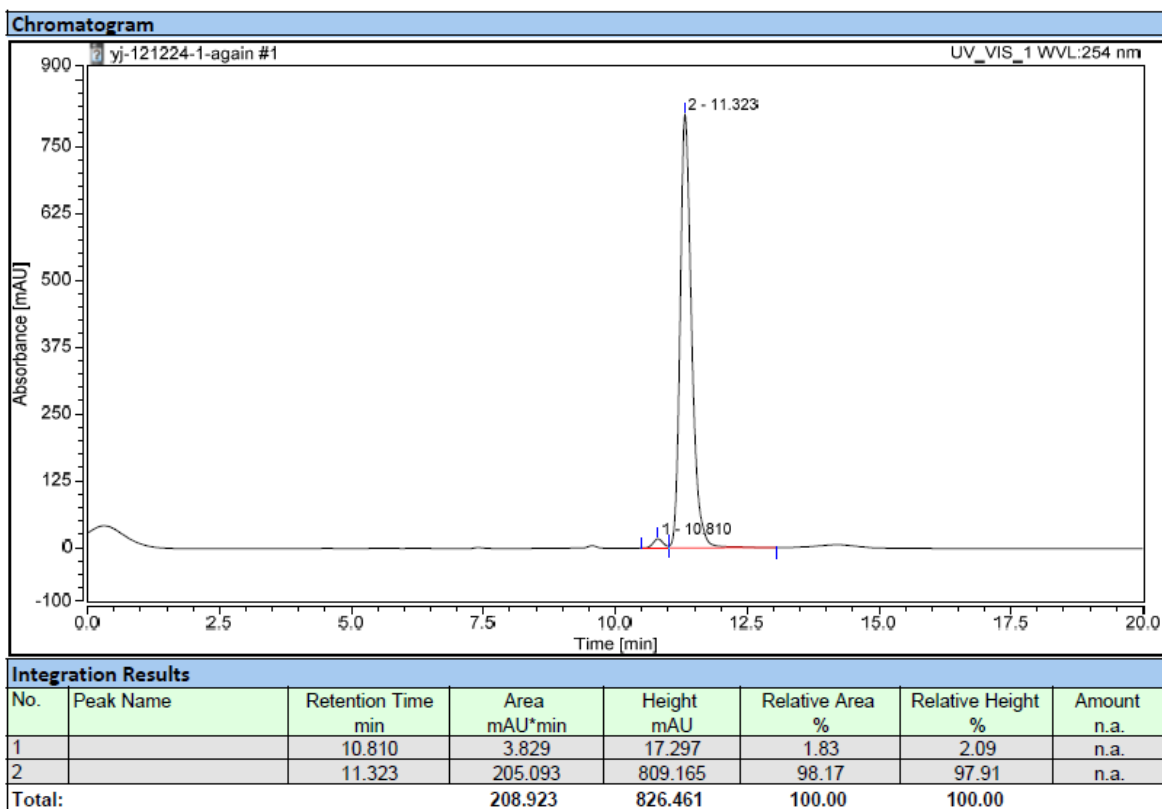



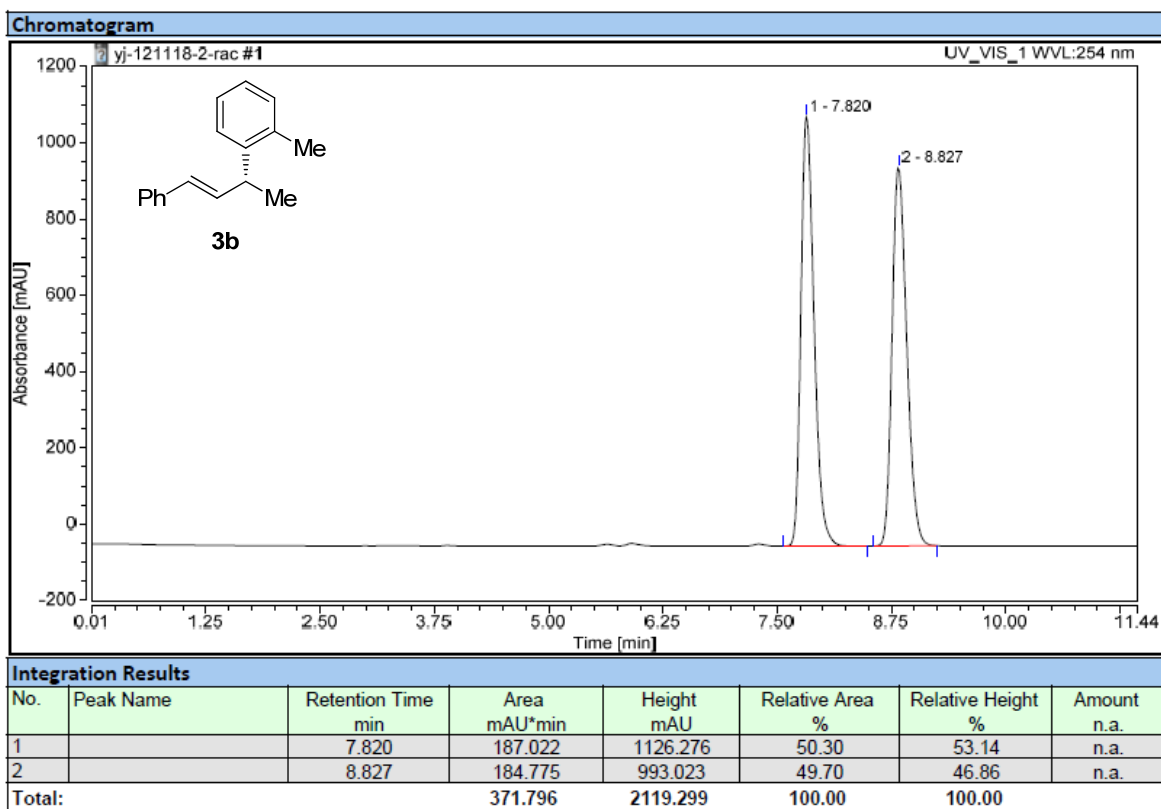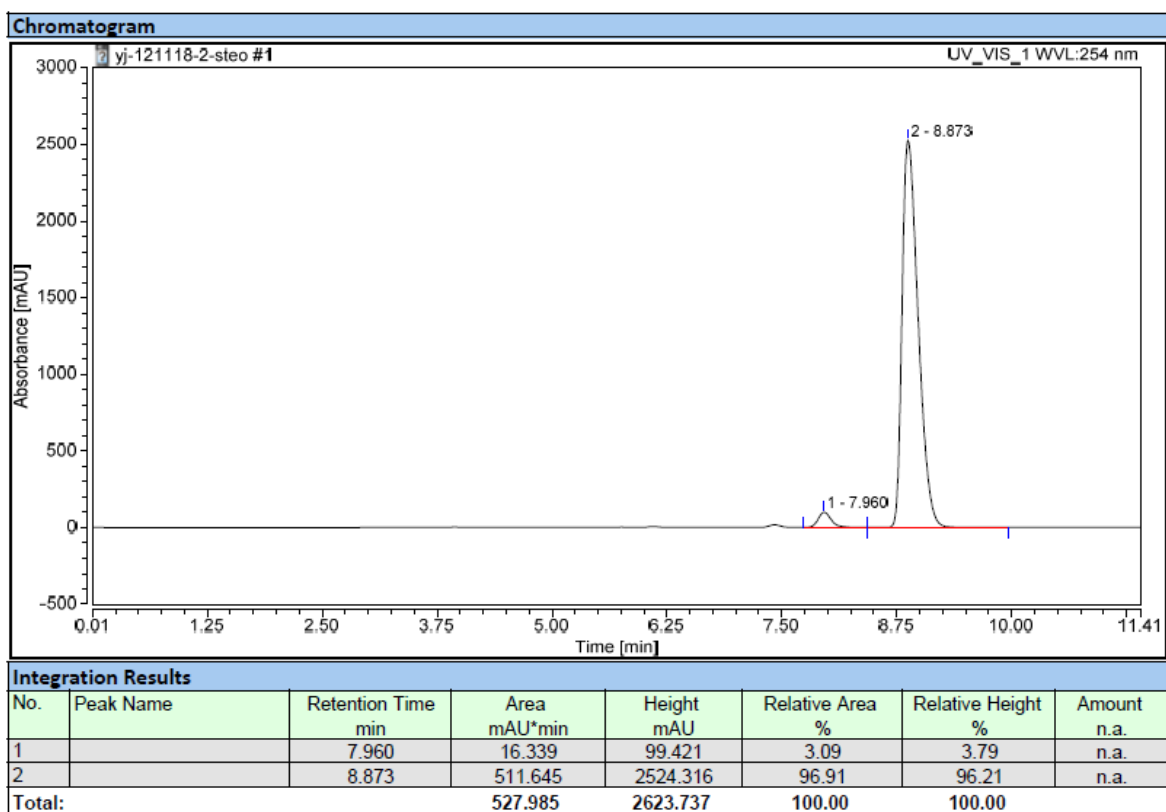

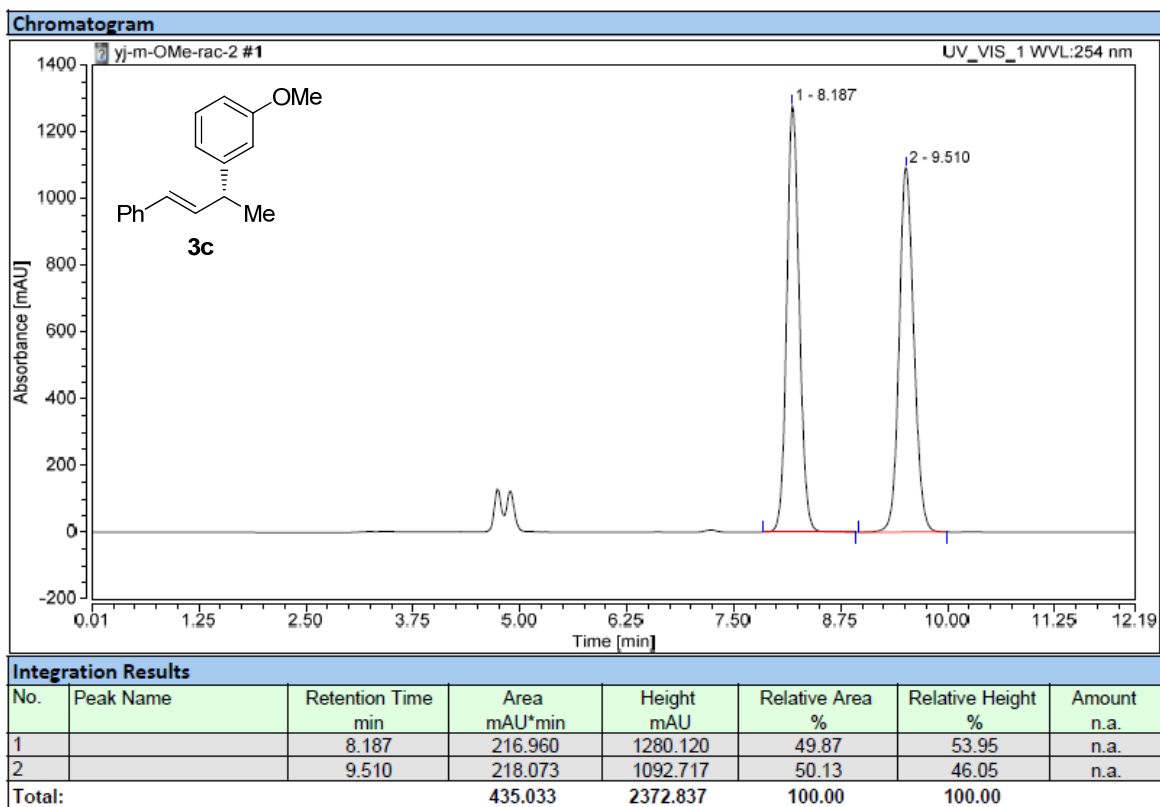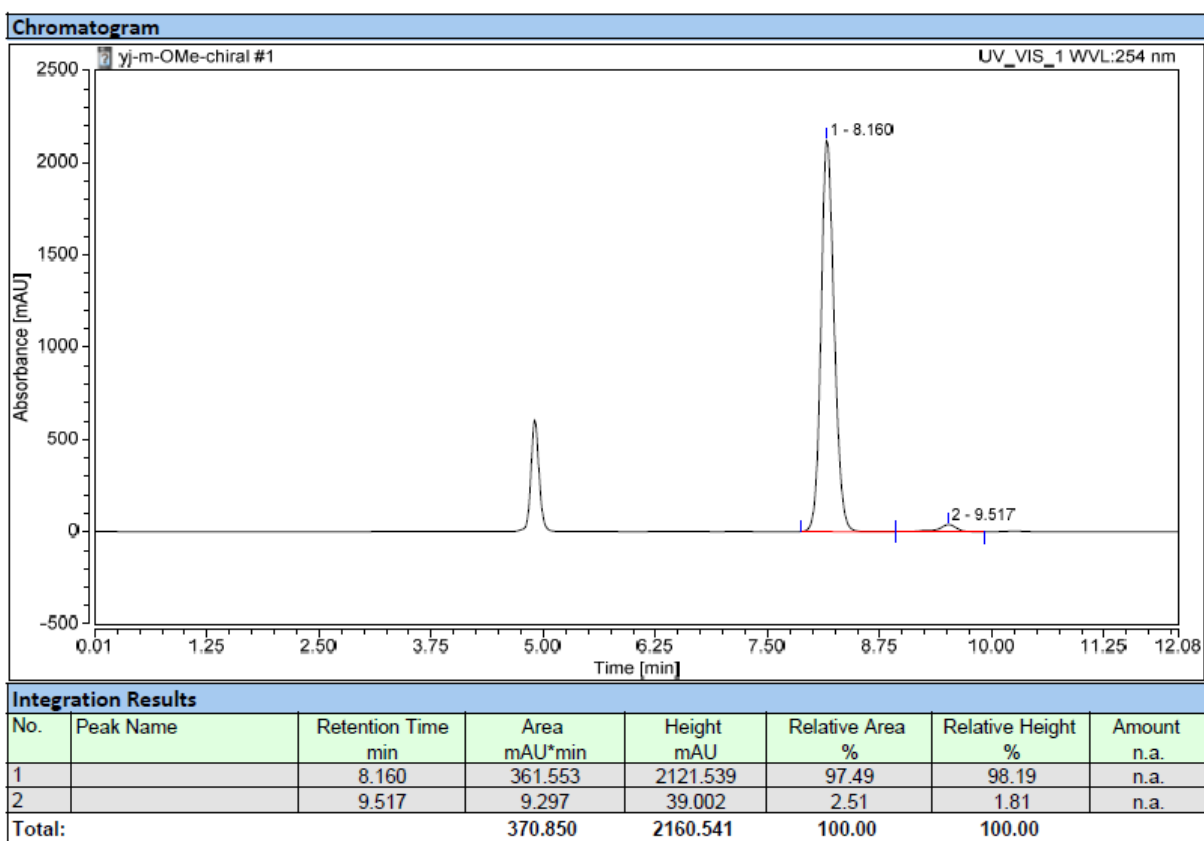

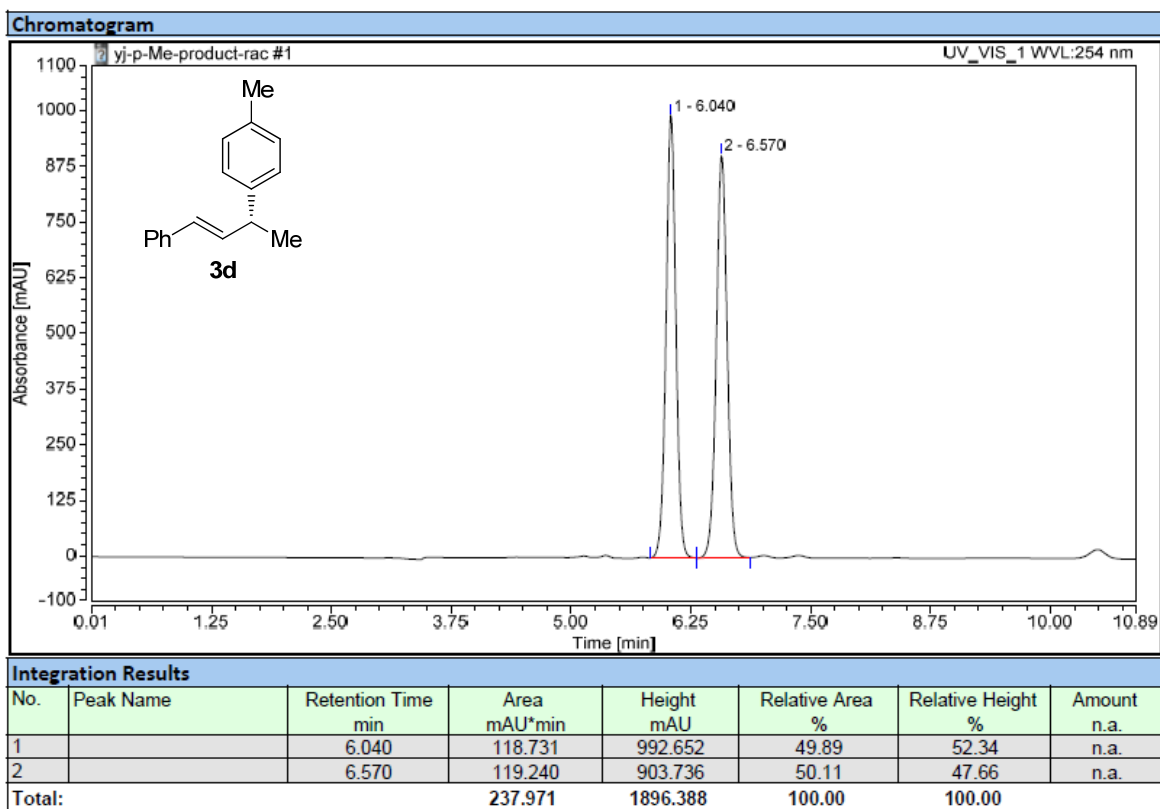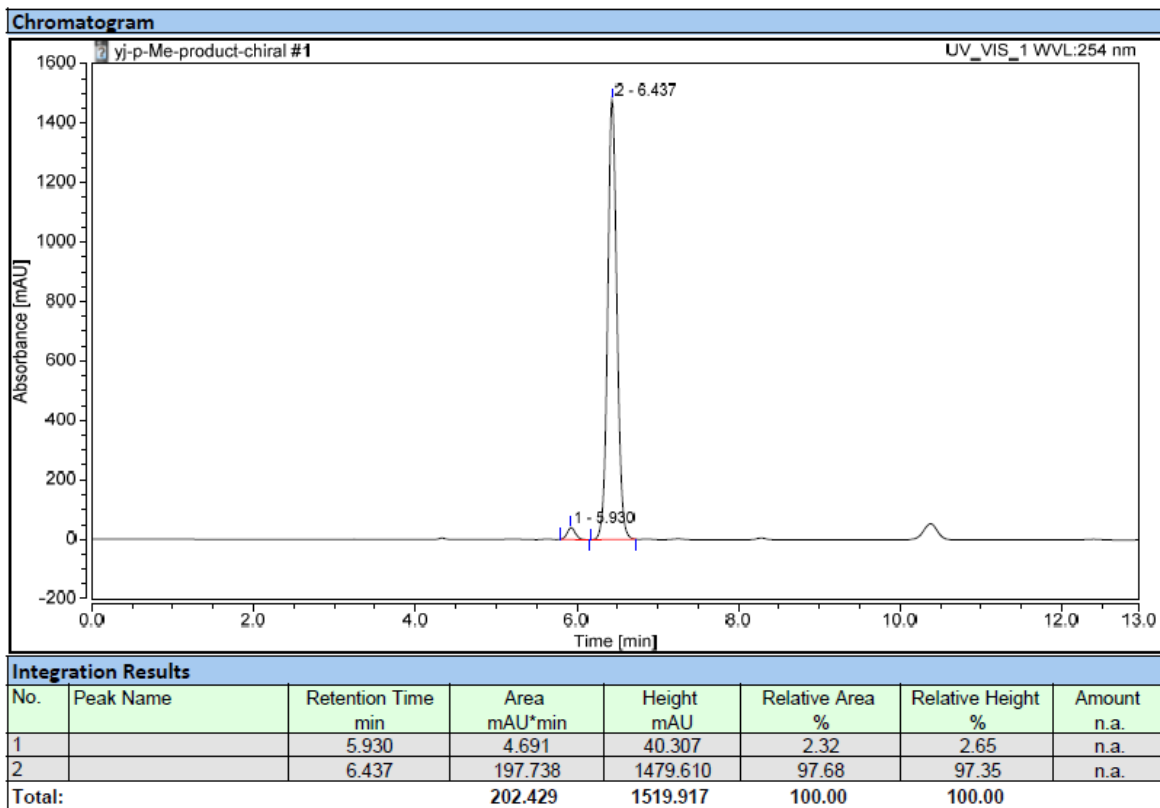

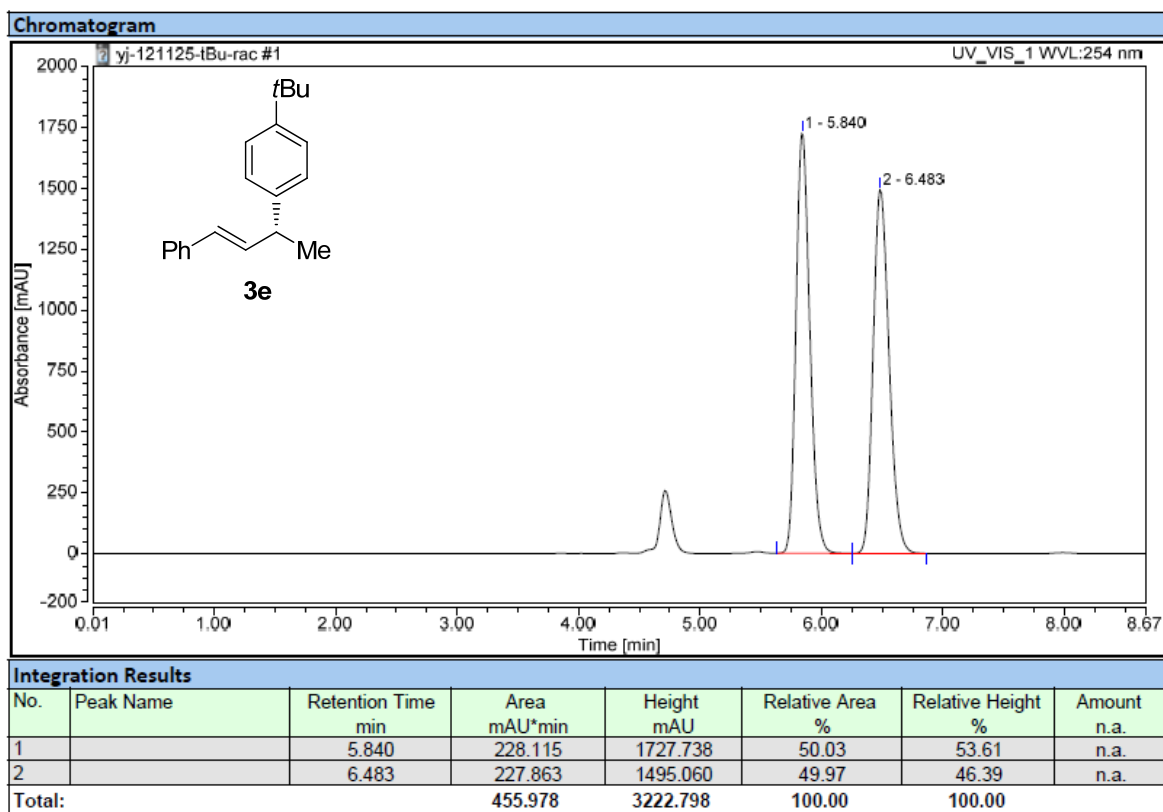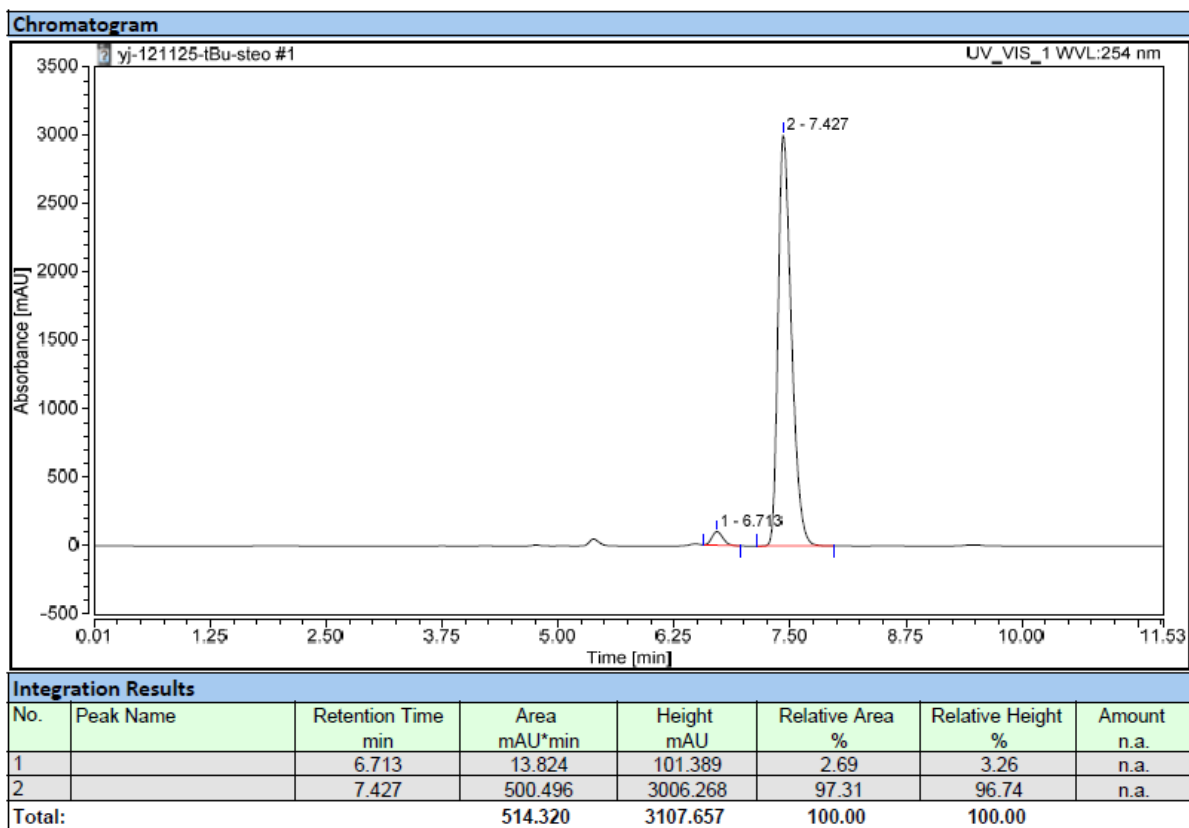

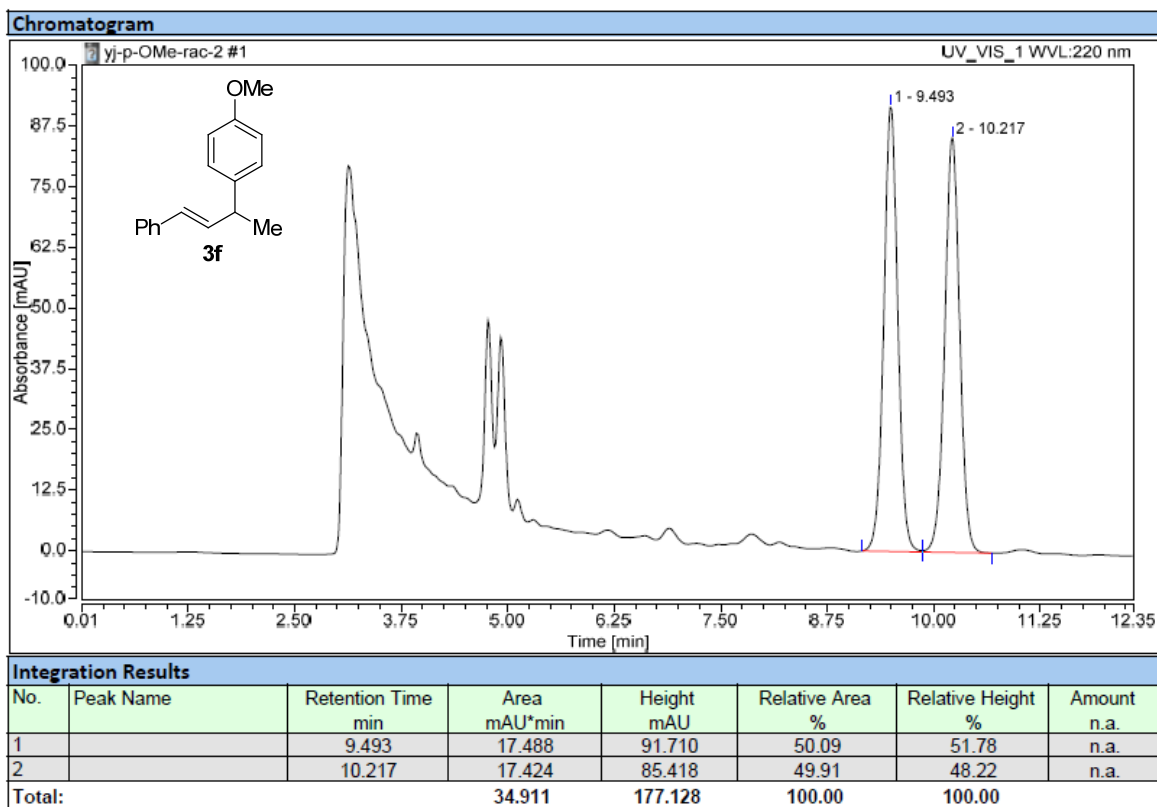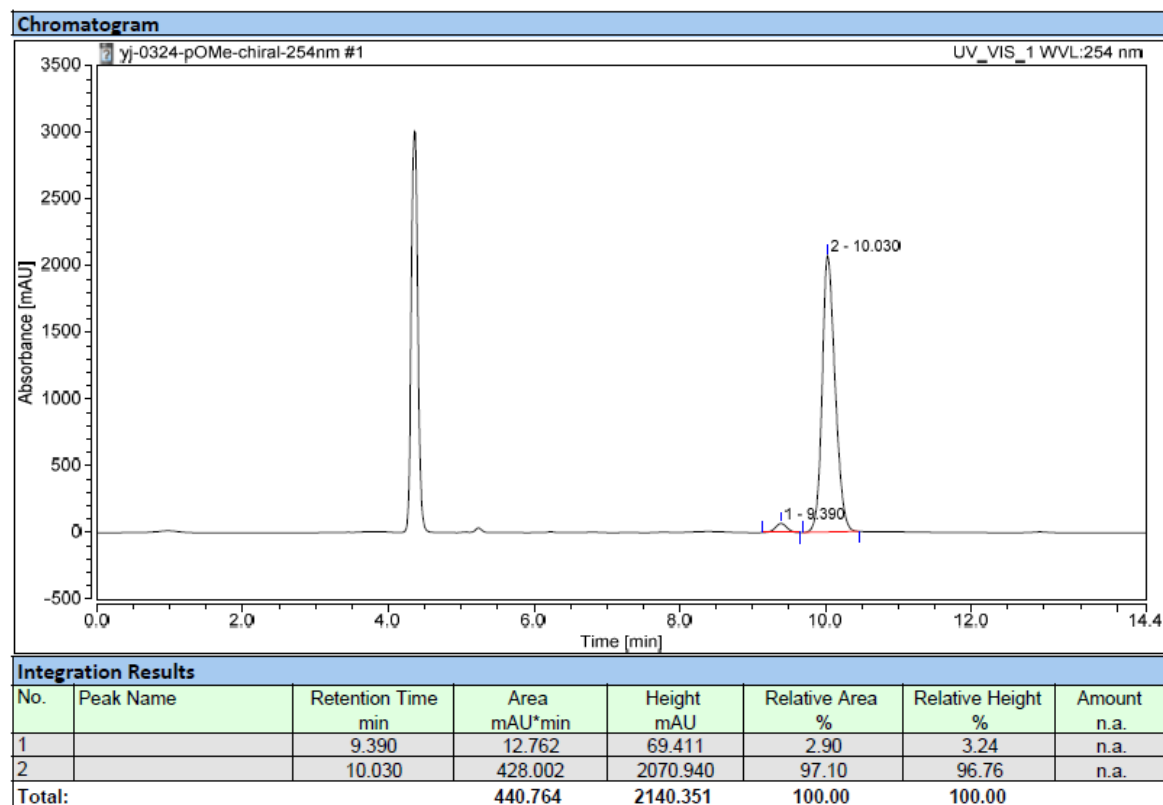

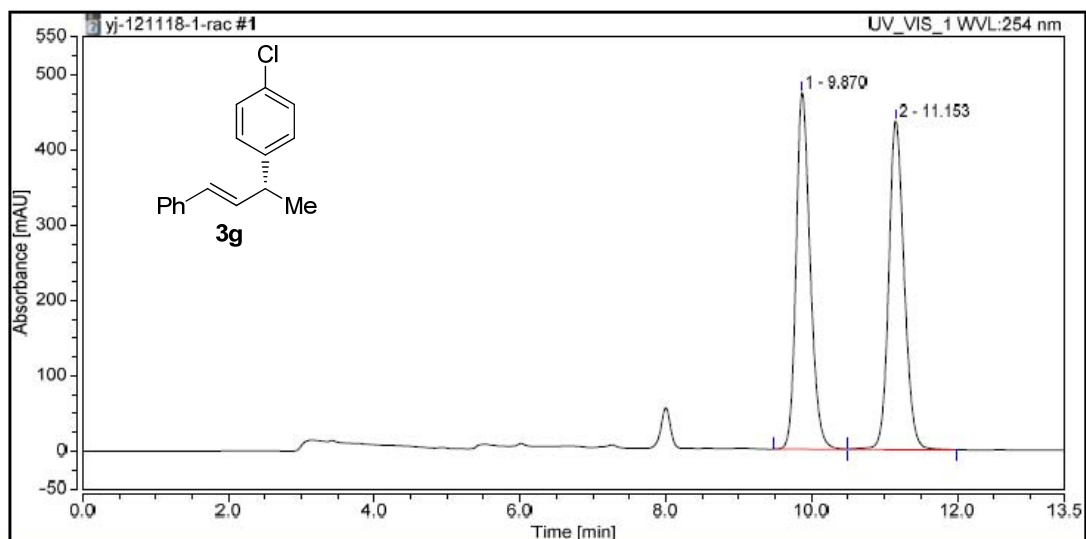

| Integration Results |           |                    |              |            |                 |                   |                |
|---------------------|-----------|--------------------|--------------|------------|-----------------|-------------------|----------------|
| No.                 | Peak Name | Retention Time min | Area mAU*min | Height mAU | Relative Area % | Relative Height % | Peak Start min |
| 1                   |           | 9.870              | 105.899      | 473.732    | 49.70           | 52.02             | 9.48           |
| 2                   |           | 11.153             | 107.195      | 436.959    | 50.30           | 47.98             | 10.48          |
| Total:              |           |                    | 213.094      | 910.692    | 100.00          | 100.00            |                |

#### Chromatogram

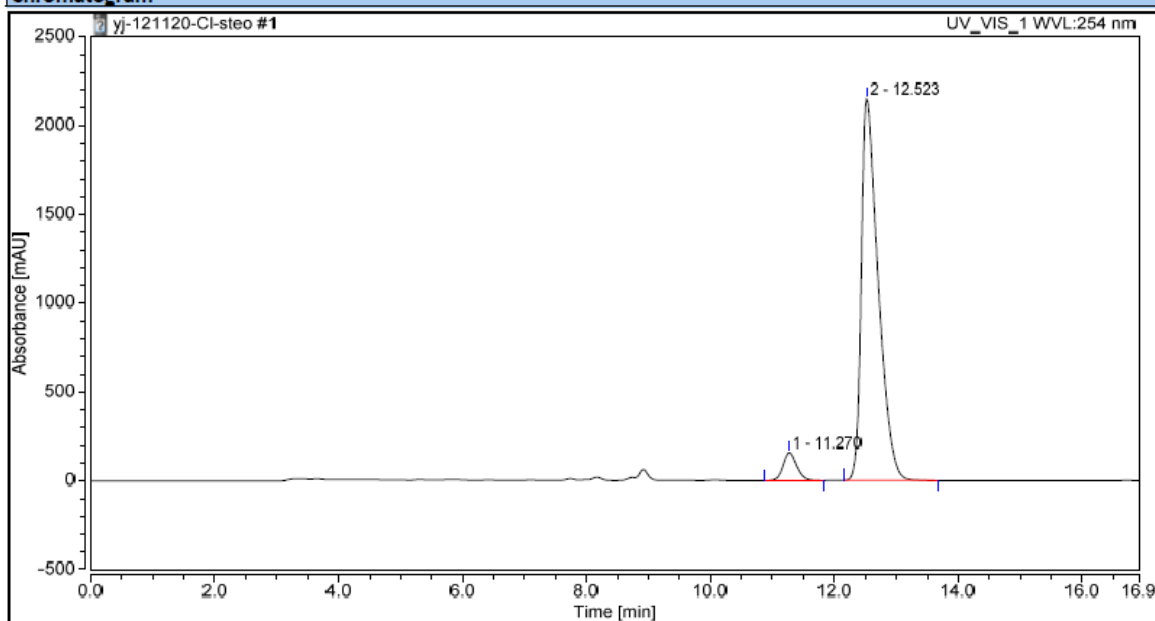

| Integration Results |           |                    |              |            |                 |                   |             |
|---------------------|-----------|--------------------|--------------|------------|-----------------|-------------------|-------------|
| No.                 | Peak Name | Retention Time min | Area mAU*min | Height mAU | Relative Area % | Relative Height % | Amount n.a. |
| 1                   |           | 11.270             | 39.199       | 155.048    | 5.50            | 6.73              | n.a.        |
| 2                   |           | 12.523             | 674.036      | 2148.927   | 94.50           | 93.27             | n.a.        |
| Total:              |           |                    | 713.235      | 2303.975   | 100.00          | 100.00            |             |

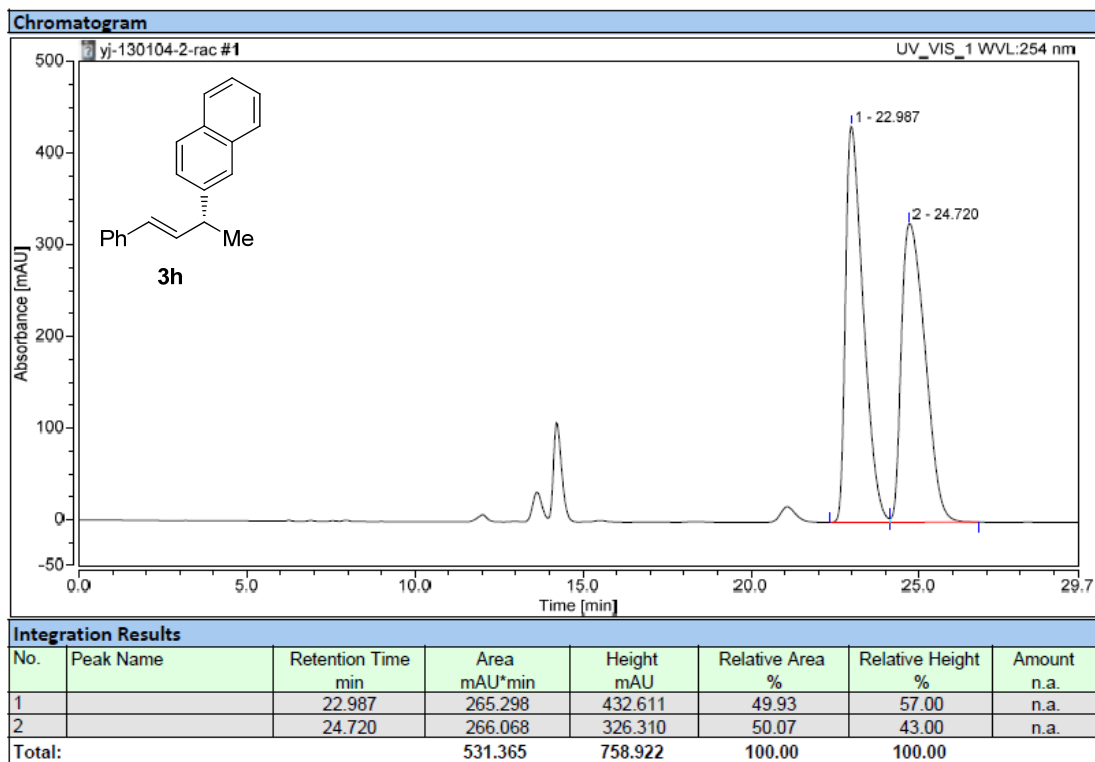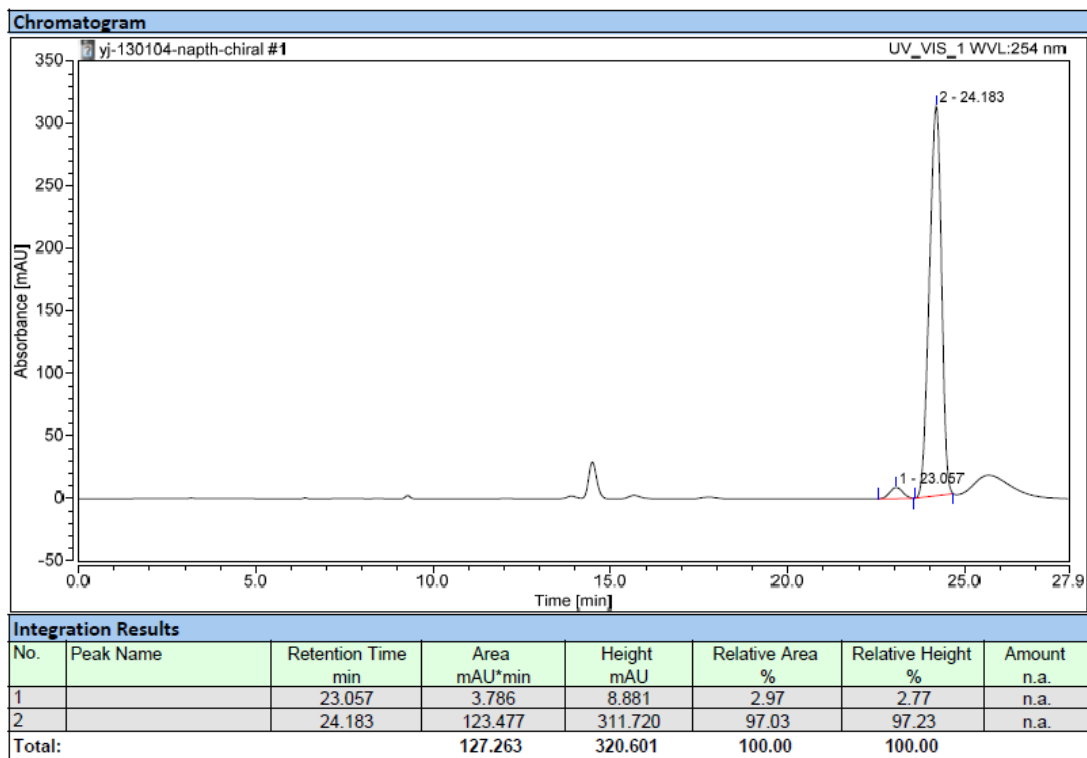

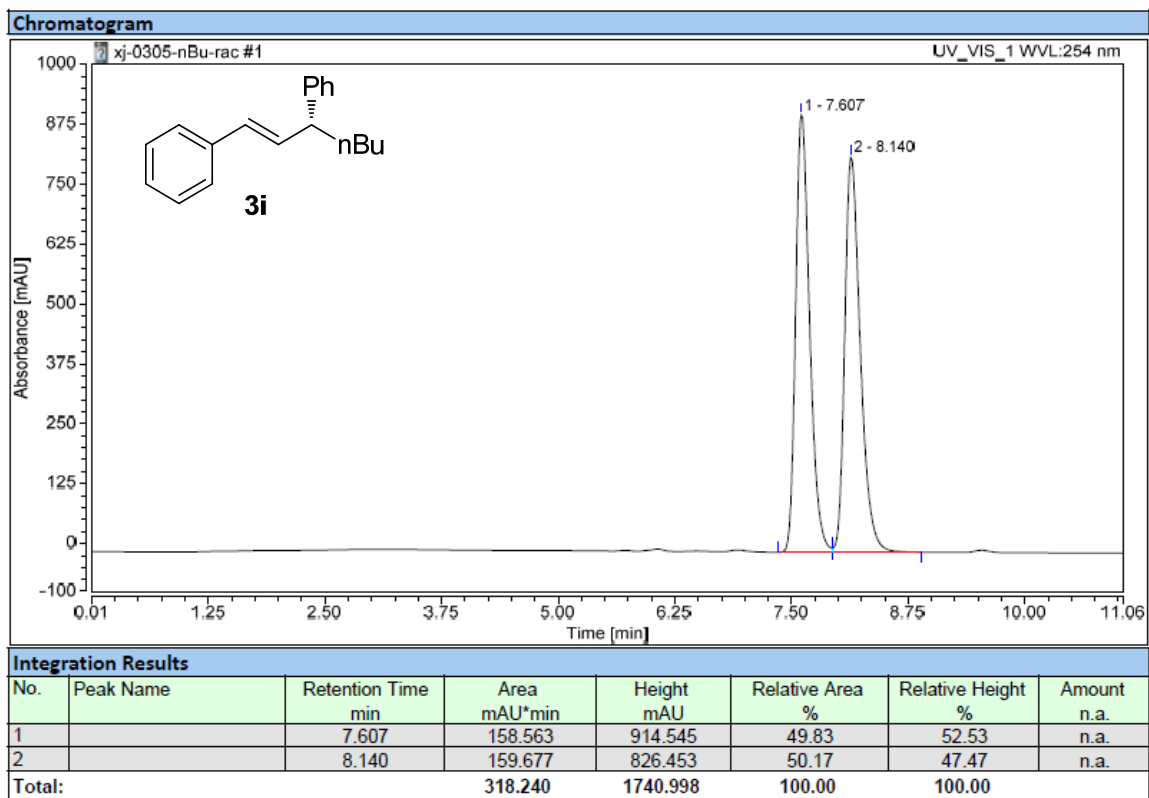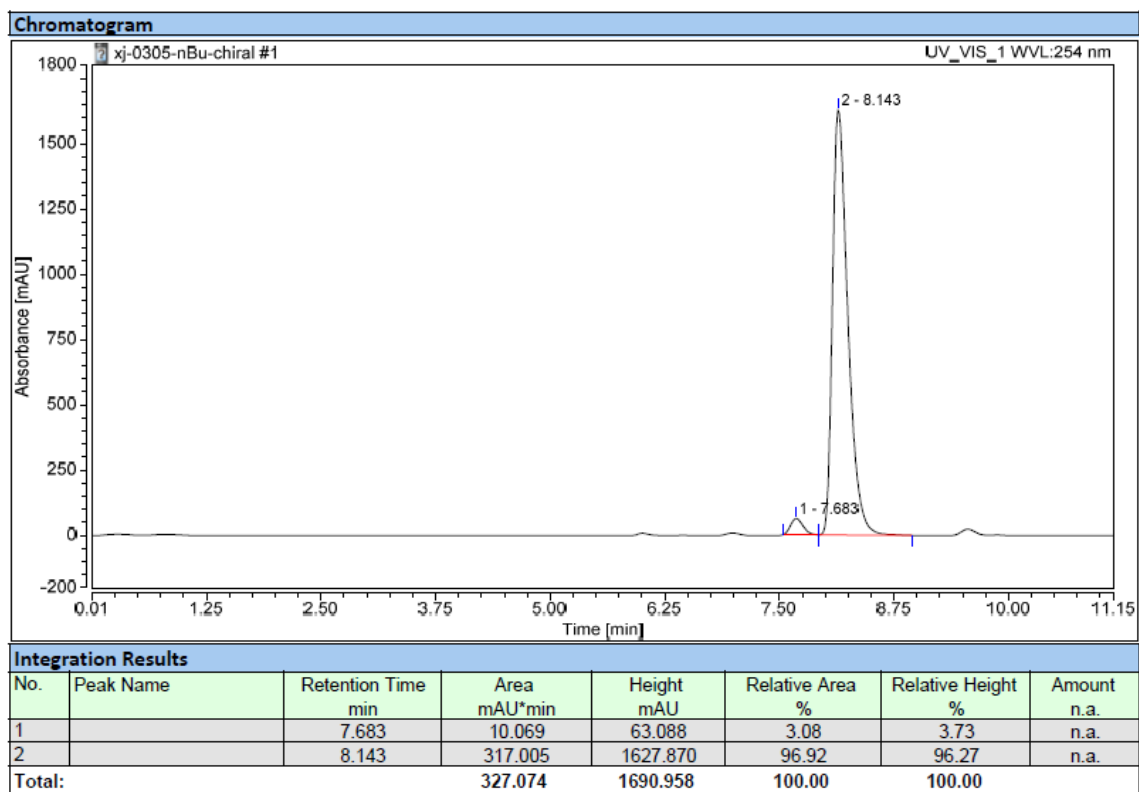



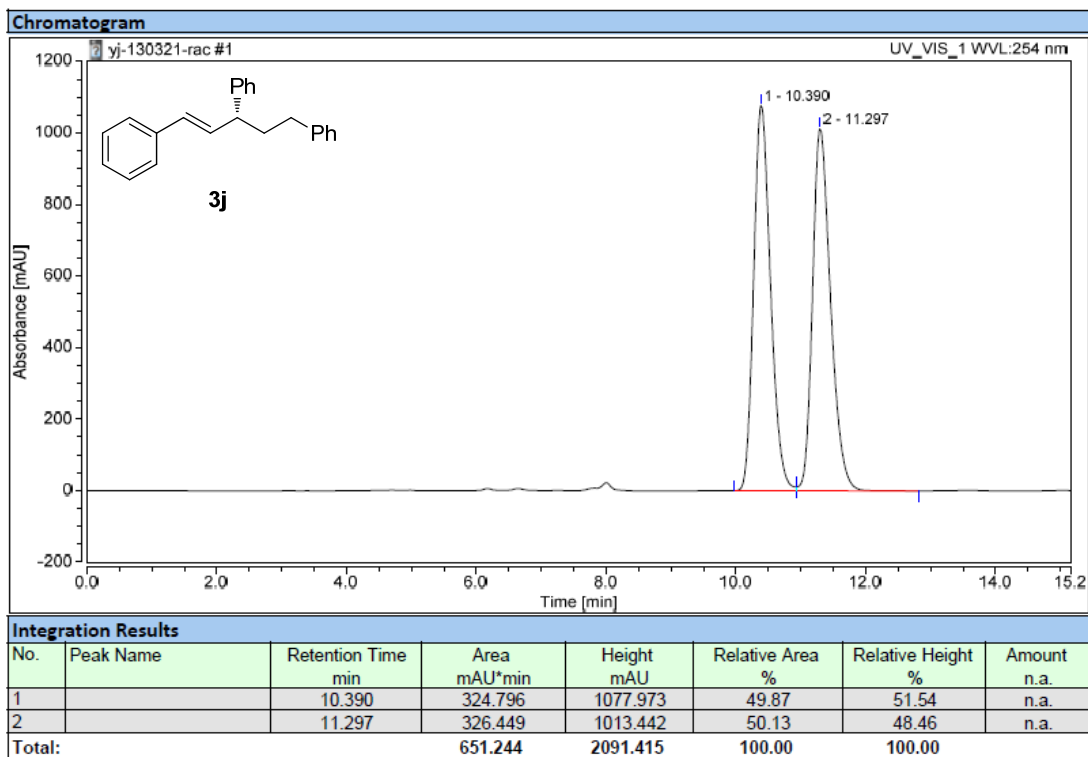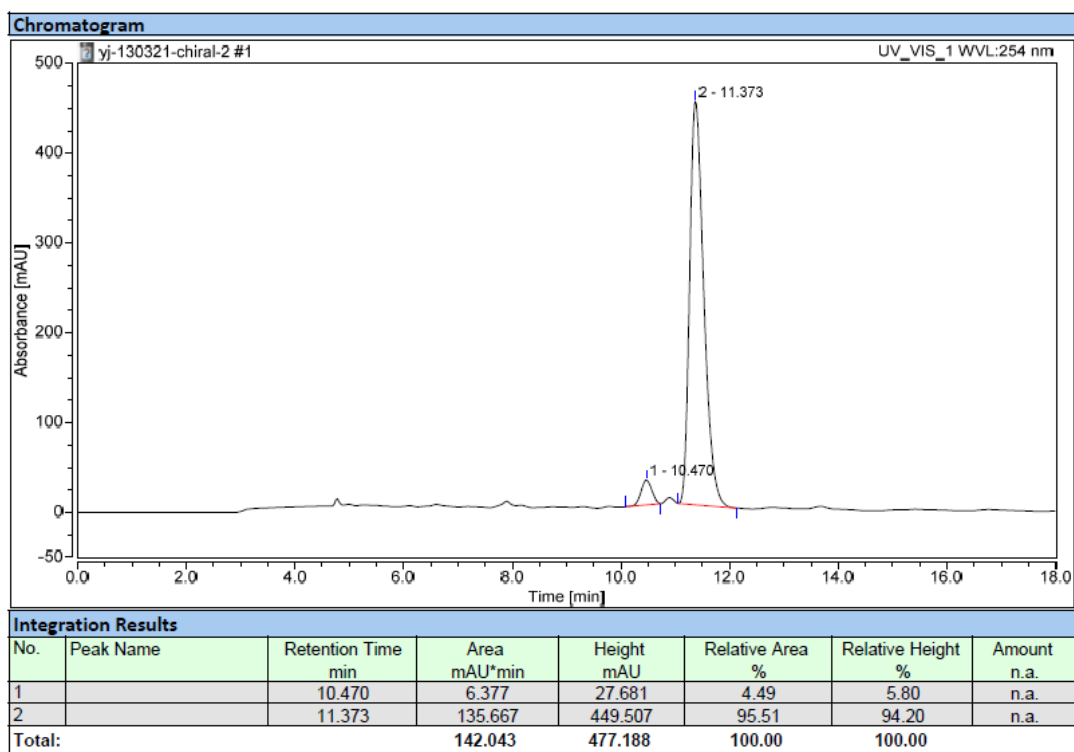

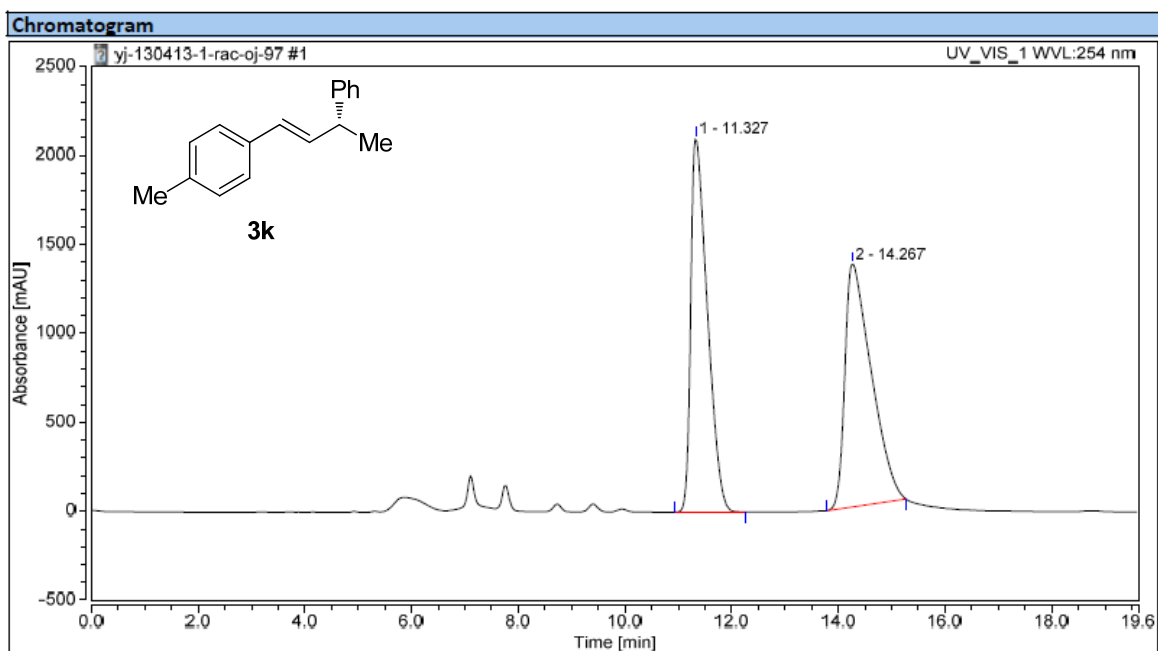

**Integration Results**

| No.    | Peak Name | Retention Time<br>min | Area<br>mAU*min | Height<br>mAU | Relative Area<br>% | Relative Height<br>% | Amount<br>n.a. |
|--------|-----------|-----------------------|-----------------|---------------|--------------------|----------------------|----------------|
| 1      |           | 11.327                | 755.296         | 2103.646      | 49.11              | 60.59                | n.a.           |
| 2      |           | 14.267                | 782.582         | 1368.177      | 50.89              | 39.41                | n.a.           |
| Total: |           |                       | 1537.878        | 3471.823      | 100.00             | 100.00               |                |

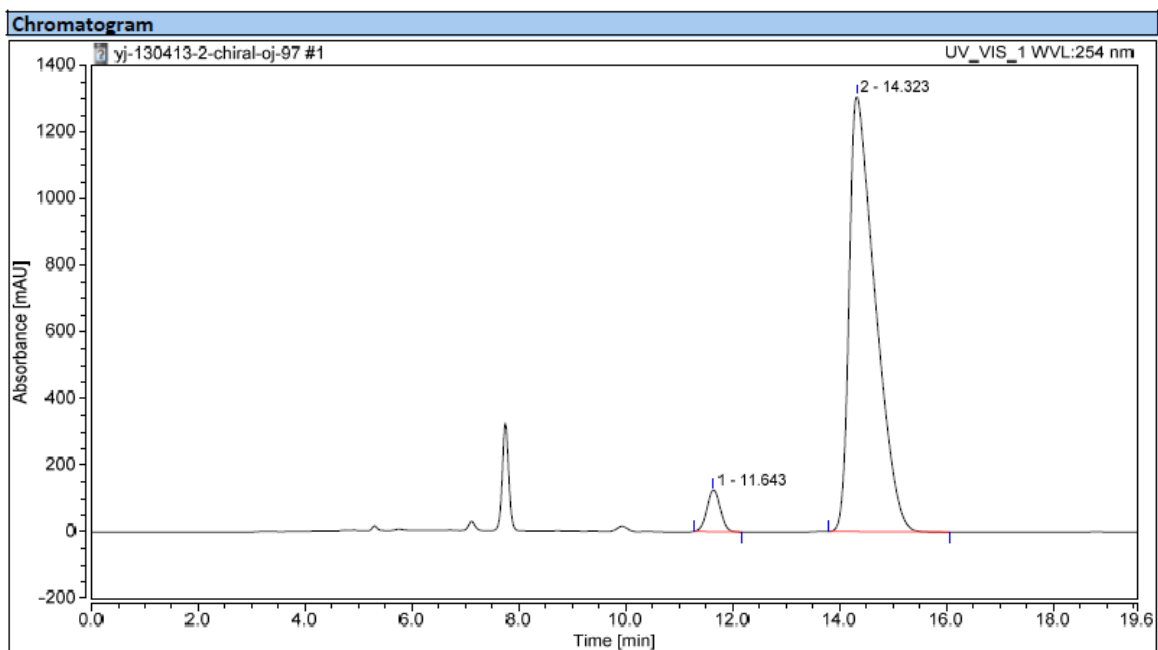

**Integration Results**

| No.    | Peak Name | Retention Time<br>min | Area<br>mAU*min | Height<br>mAU | Relative Area<br>% | Relative Height<br>% | Amount<br>n.a. |
|--------|-----------|-----------------------|-----------------|---------------|--------------------|----------------------|----------------|
| 1      |           | 11.643                | 36.258          | 125.955       | 4.70               | 8.78                 | n.a.           |
| 2      |           | 14.323                | 734.629         | 1308.281      | 95.30              | 91.22                | n.a.           |
| Total: |           |                       | 770.886         | 1434.236      | 100.00             | 100.00               |                |

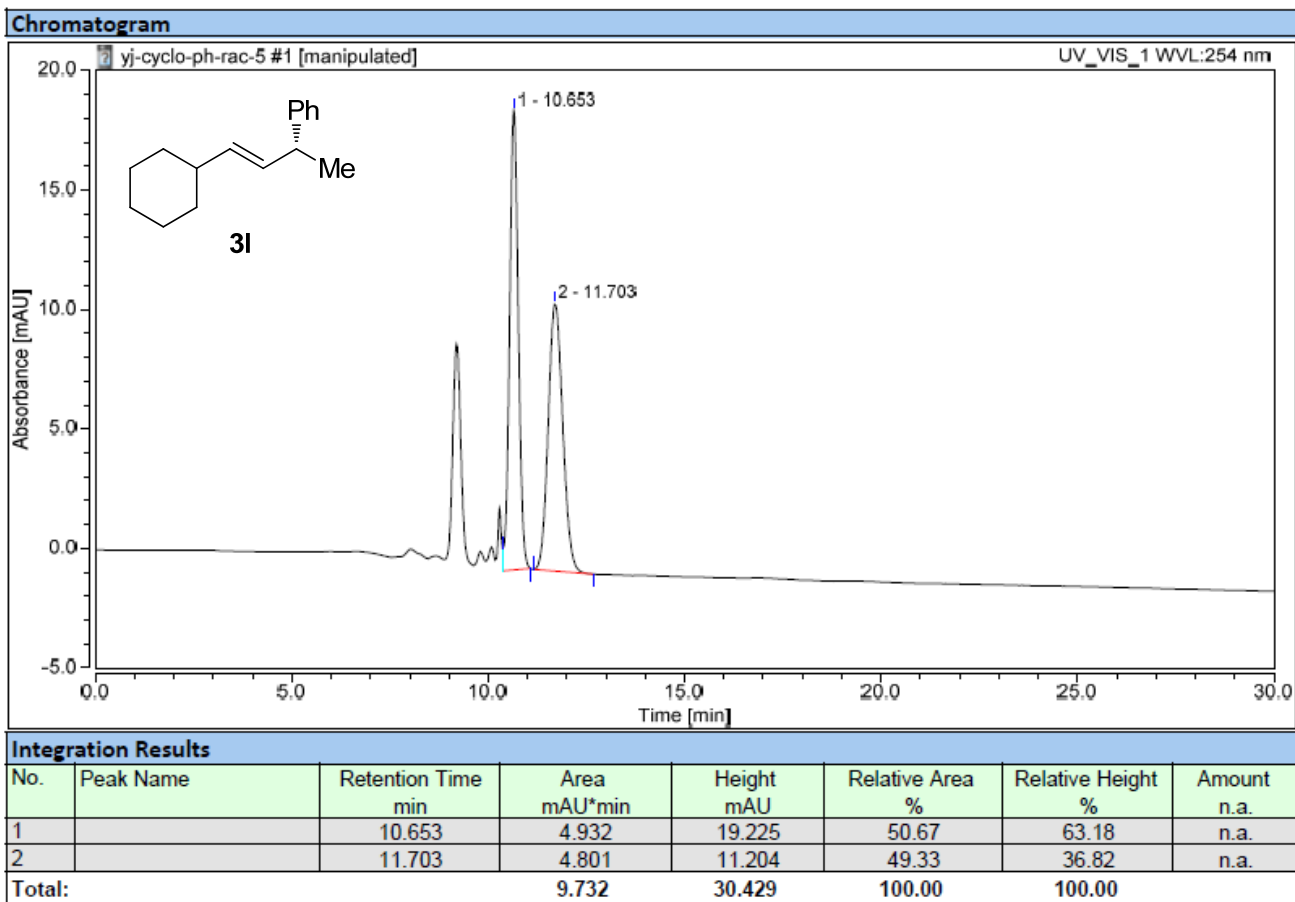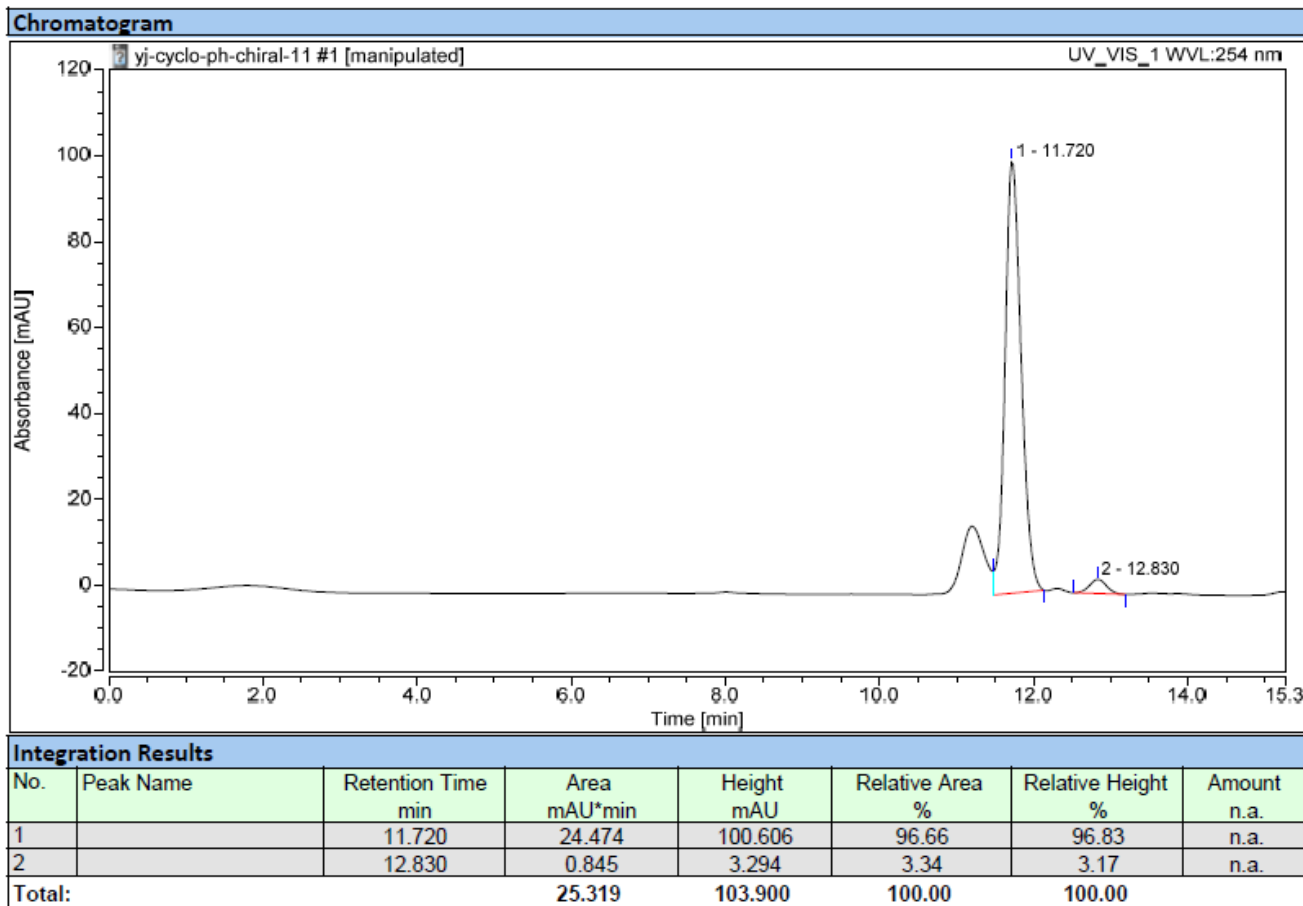

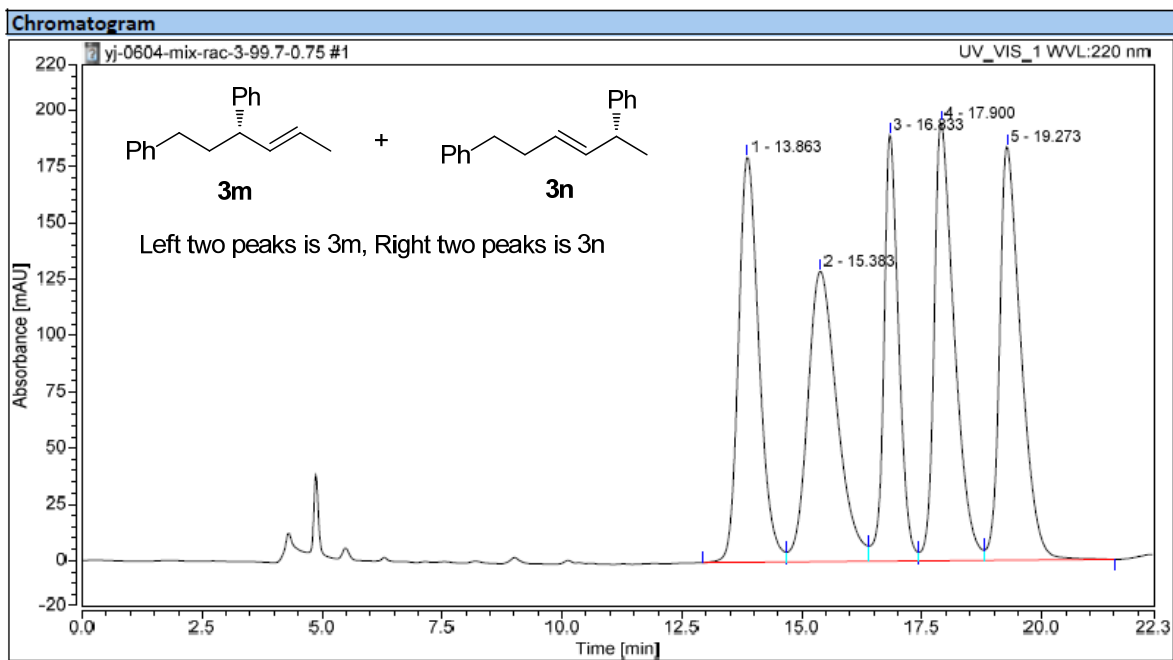

**Integration Results**

| No.    | Peak Name | Retention Time<br>min | Area<br>mAU*min | Height<br>mAU | Relative Area<br>% | Relative Height<br>% | Amount<br>n.a. |
|--------|-----------|-----------------------|-----------------|---------------|--------------------|----------------------|----------------|
| 1      |           | 13.863                | 89.096          | 180.182       | 20.37              | 20.55                | n.a.           |
| 2      |           | 15.383                | 91.229          | 128.971       | 20.86              | 14.71                | n.a.           |
| 3      |           | 16.833                | 67.521          | 189.516       | 15.44              | 21.61                | n.a.           |
| 4      |           | 17.900                | 94.772          | 194.674       | 21.67              | 22.20                | n.a.           |
| 5      |           | 19.273                | 94.688          | 183.617       | 21.65              | 20.94                | n.a.           |
| Total: |           |                       | 437.306         | 876.959       | 100.00             | 100.00               |                |

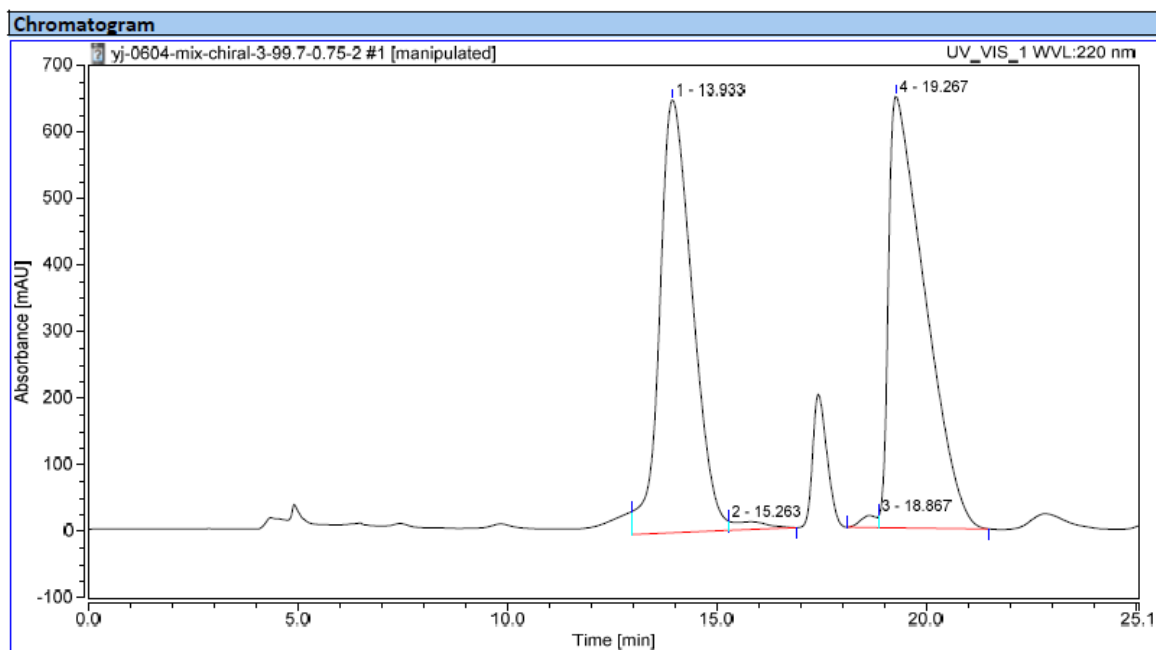

**Integration Results**

| No.    | Peak Name | Retention Time<br>min | Area<br>mAU*min | Height<br>mAU | Relative Area<br>% | Relative Height<br>% | Amount<br>n.a. |
|--------|-----------|-----------------------|-----------------|---------------|--------------------|----------------------|----------------|
| 1      |           | 13.933                | 587.338         | 650.697       | 46.71              | 48.84                | n.a.           |
| 2      |           | 15.263                | 11.748          | 14.087        | 0.93               | 1.06                 | n.a.           |
| 3      |           | 18.867                | 8.330           | 18.678        | 0.66               | 1.40                 | n.a.           |
| 4      |           | 19.267                | 649.975         | 648.827       | 51.69              | 48.70                | n.a.           |
| Total: |           |                       | 1257.391        | 1332.289      | 100.00             | 100.00               |                |

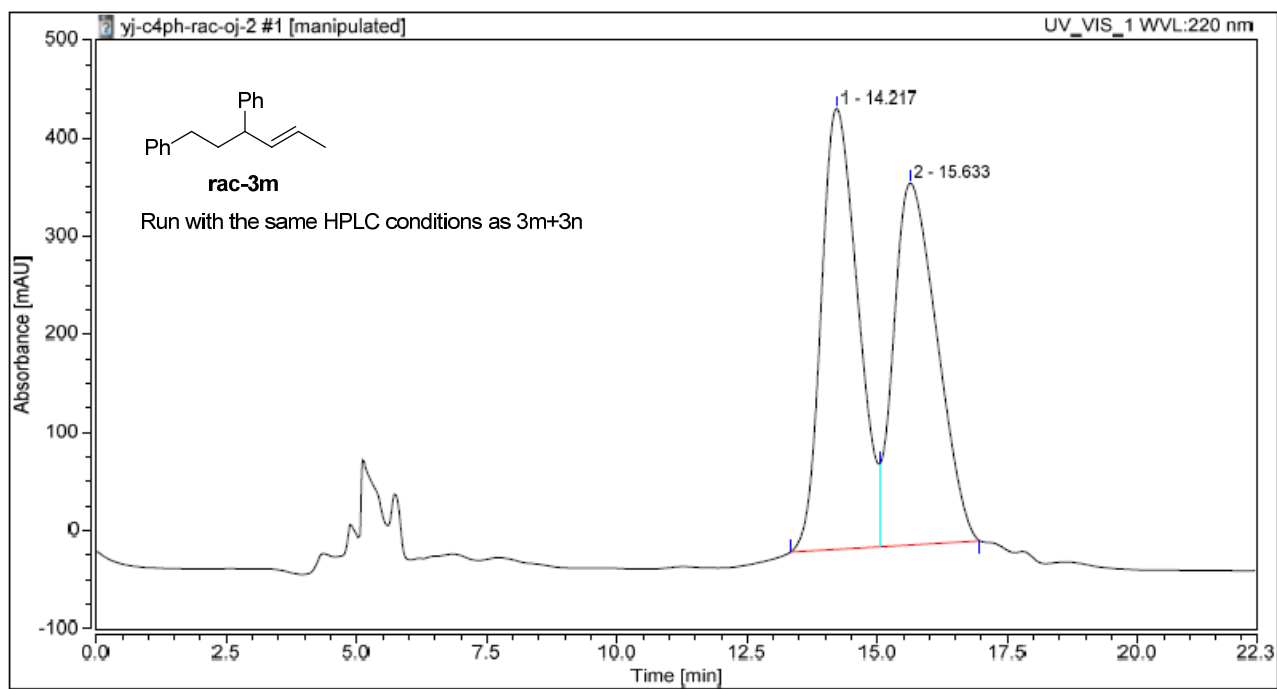

| Integration Results |           |                       |                 |               |                    |                      |                |
|---------------------|-----------|-----------------------|-----------------|---------------|--------------------|----------------------|----------------|
| No.                 | Peak Name | Retention Time<br>min | Area<br>mAU*min | Height<br>mAU | Relative Area<br>% | Relative Height<br>% | Amount<br>n.a. |
| 1                   |           | 14.217                | 365.058         | 449.078       | 50.63              | 54.92                | n.a.           |
| 2                   |           | 15.633                | 355.985         | 368.648       | 49.37              | 45.08                | n.a.           |
| Total:              |           |                       | 721.043         | 817.726       | 100.00             | 100.00               |                |
